# Supplementary material for: Surface runoff alters cave microbial community structure and function
Source: PubMed Central journal article supplement (PMC7202643; doi:10.1371/journal.pone.0232742), 2020-05-06
Supplement: pone.0232742.s002.pdf [file pone.0232742.s002.pdf]

| OTU Number | 7.11.15 Rep1 | 7.11.15 Rep2 | 7.11.15 Rep3 | 8.29.15 Rep1 | 8.29.15 Rep2 | 8.29.15 Rep3 | 2.6.16 Rep1 | 2.6.16 Rep2 | 2.6.16 Rep3 | 12.10.16 Rep1 | 12.10.16 Rep2 | 12.10.16 Rep3 |
|------------|--------------|--------------|--------------|--------------|--------------|--------------|-------------|-------------|-------------|---------------|---------------|---------------|
| 1          | 376          | 754          | 45           | 442          | 1602         | 146          | 13670       | 0           | 15966       | 0             | 0             | 4306          |
| 2          | 23366        | 8645         | 38916        | 3847         | 4685         | 2136         | 1           | 0           | 0           | 0             | 0             | 0             |
| 3          | 1610         | 1516         | 682          | 21374        | 17524        | 12666        | 0           | 0           | 0           | 0             | 74            | 0             |
| 4          | 373          | 133          | 565          | 4554         | 3404         | 2852         | 2           | 3           | 0           | 0             | 332           | 0             |
| 5          | 7479         | 3384         | 1797         | 1016         | 1603         | 1077         | 0           | 0           | 0           | 0             | 0             | 0             |
| 6          | 0            | 0            | 0            | 0            | 0            | 0            | 0           | 0           | 0           | 16611         | 0             | 0             |
| 7          | 0            | 0            | 0            | 0            | 0            | 0            | 0           | 14407       | 0           | 0             | 0             | 1506          |
| 8          | 52           | 110          | 3            | 51           | 259          | 19           | 1463        | 0           | 1871        | 742           | 0             | 0             |
| 9          | 2342         | 653          | 516          | 1232         | 1123         | 813          | 0           | 0           | 0           | 0             | 0             | 0             |
| 10         | 33           | 24           | 88           | 1257         | 1685         | 1148         | 0           | 0           | 0           | 0             | 0             | 0             |
| 11         | 0            | 0            | 0            | 0            | 0            | 0            | 0           | 0           | 0           | 0             | 0             | 0             |
| 12         | 0            | 0            | 0            | 0            | 0            | 0            | 0           | 6155        | 0           | 0             | 0             | 0             |
| 13         | 0            | 0            | 0            | 0            | 0            | 0            | 0           | 0           | 5221        | 0             | 0             | 0             |
| 14         | 0            | 0            | 0            | 0            | 0            | 0            | 0           | 0           | 0           | 4405          | 0             | 0             |
| 15         | 209          | 475          | 307          | 7            | 84           | 58           | 0           | 0           | 0           | 0             | 0             | 0             |
| 16         | 5            | 3            | 0            | 1            | 1            | 7            | 0           | 0           | 0           | 0             | 0             | 0             |
| 17         | 0            | 0            | 0            | 0            | 0            | 0            | 0           | 0           | 0           | 0             | 0             | 2395          |
| 18         | 38           | 99           | 273          | 97           | 488          | 199          | 0           | 0           | 0           | 0             | 0             | 0             |
| 19         | 354          | 150          | 124          | 47           | 76           | 52           | 0           | 0           | 0           | 0             | 0             | 0             |
| 20         | 0            | 0            | 0            | 0            | 0            | 0            | 0           | 0           | 0           | 1825          | 241           | 0             |
| 21         | 0            | 0            | 0            | 0            | 0            | 0            | 0           | 0           | 0           | 0             | 0             | 0             |
| 22         | 0            | 0            | 0            | 0            | 0            | 0            | 0           | 2021        | 0           | 0             | 0             | 0             |
| 23         | 0            | 0            | 0            | 0            | 0            | 0            | 0           | 0           | 2018        | 0             | 0             | 0             |
| 24         | 6            | 5            | 2            | 432          | 279          | 172          | 0           | 0           | 0           | 0             | 0             | 0             |
| 25         | 0            | 0            | 0            | 0            | 0            | 0            | 0           | 1787        | 0           | 0             | 0             | 0             |
| 26         | 0            | 0            | 0            | 0            | 0            | 0            | 0           | 0           | 0           | 0             | 1782          | 0             |
| 27         | 616          | 421          | 110          | 21           | 36           | 31           | 0           | 0           | 0           | 0             | 0             | 0             |
| 28         | 0            | 0            | 0            | 0            | 0            | 0            | 0           | 0           | 0           | 1509          | 0             | 0             |
| 29         | 225          | 132          | 83           | 27           | 56           | 61           | 0           | 0           | 0           | 0             | 0             | 0             |
| 30         | 0            | 0            | 0            | 0            | 0            | 0            | 0           | 0           | 0           | 0             | 0             | 0             |
| 31         | 0            | 0            | 0            | 0            | 0            | 0            | 0           | 0           | 0           | 1309          | 0             | 0             |
| 32         | 35           | 34           | 25           | 56           | 108          | 262          | 0           | 0           | 0           | 0             | 0             | 0             |
| 33         | 0            | 0            | 0            | 0            | 0            | 0            | 0           | 1156        | 0           | 0             | 0             | 0             |
| 34         | 0            | 0            | 0            | 0            | 0            | 0            | 0           | 0           | 1151        | 0             | 0             | 0             |
| 35         | 27           | 8            | 21           | 83           | 195          | 108          | 0           | 0           | 0           | 0             | 0             | 0             |
| 36         | 0            | 0            | 0            | 0            | 0            | 0            | 0           | 0           | 0           | 0             | 922           | 0             |
| 37         | 272          | 143          | 43           | 12           | 47           | 27           | 0           | 0           | 0           | 0             | 0             | 0             |
| 38         | 0            | 0            | 0            | 0            | 0            | 0            | 0           | 0           | 0           | 0             | 0             | 0             |
| 39         | 0            | 0            | 0            | 0            | 0            | 0            | 0           | 0           | 0           | 0             | 0             | 0             |
| 40         | 197          | 126          | 41           | 7            | 18           | 13           | 0           | 0           | 0           | 0             | 0             | 0             |
| 41         | 0            | 0            | 0            | 0            | 0            | 0            | 0           | 0           | 0           | 0             | 0             | 700           |
| 42         | 0            | 0            | 0            | 0            | 0            | 0            | 0           | 0           | 0           | 0             | 668           | 0             |
| 43         | 0            | 0            | 0            | 0            | 0            | 0            | 0           | 0           | 0           | 0             | 0             | 664           |
| 44         | 2            | 2            | 0            | 5            | 143          | 103          | 0           | 0           | 0           | 0             | 0             | 0             |
| 45         | 0            | 0            | 0            | 0            | 0            | 0            | 0           | 0           | 640         | 0             | 0             | 0             |

| OTU Number | 7.11.15 Rep1 | 7.11.15 Rep2 | 7.11.15 Rep3 | 8.29.15 Rep1 | 8.29.15 Rep2 | 8.29.15 Rep3 | 2.6.16 Rep1 | 2.6.16 Rep2 | 2.6.16 Rep3 | 12.10.16 Rep1 | 12.10.16 Rep2 | 12.10.16 Rep3 |
|------------|--------------|--------------|--------------|--------------|--------------|--------------|-------------|-------------|-------------|---------------|---------------|---------------|
| 46         | 0            | 0            | 0            | 0            | 0            | 0            | 0           | 0           | 0           | 0             | 0             | 0             |
| 47         | 7            | 30           | 2            | 2            | 3            | 2            | 0           | 0           | 0           | 0             | 0             | 0             |
| 48         | 0            | 0            | 0            | 0            | 0            | 0            | 0           | 0           | 0           | 0             | 595           | 0             |
| 49         | 0            | 0            | 0            | 0            | 0            | 0            | 0           | 578         | 0           | 0             | 0             | 0             |
| 50         | 0            | 0            | 0            | 0            | 0            | 0            | 0           | 0           | 0           | 0             | 0             | 540           |
| 51         | 0            | 0            | 0            | 0            | 0            | 0            | 0           | 0           | 0           | 0             | 504           | 0             |
| 52         | 0            | 0            | 0            | 0            | 0            | 0            | 0           | 0           | 0           | 0             | 0             | 483           |
| 53         | 5            | 3            | 5            | 19           | 21           | 6            | 0           | 0           | 0           | 0             | 0             | 0             |
| 54         | 1            | 7            | 4            | 18           | 84           | 74           | 0           | 0           | 0           | 0             | 0             | 0             |
| 55         | 0            | 0            | 0            | 0            | 0            | 0            | 0           | 0           | 0           | 0             | 0             | 0             |
| 56         | 0            | 0            | 0            | 0            | 0            | 0            | 0           | 0           | 0           | 0             | 0             | 401           |
| 57         | 0            | 0            | 0            | 0            | 0            | 0            | 0           | 0           | 0           | 0             | 0             | 0             |
| 58         | 0            | 0            | 0            | 0            | 0            | 0            | 0           | 0           | 0           | 0             | 0             | 385           |
| 59         | 0            | 0            | 0            | 0            | 0            | 0            | 0           | 0           | 0           | 0             | 0             | 0             |
| 60         | 12           | 5            | 12           | 5            | 3            | 7            | 0           | 0           | 0           | 0             | 0             | 0             |
| 61         | 0            | 0            | 0            | 0            | 0            | 0            | 0           | 0           | 0           | 0             | 352           | 0             |
| 62         | 0            | 0            | 0            | 0            | 0            | 0            | 0           | 0           | 0           | 0             | 0             | 0             |
| 63         | 0            | 0            | 0            | 0            | 0            | 0            | 0           | 0           | 0           | 0             | 0             | 318           |
| 64         | 5            | 4            | 1            | 2            | 13           | 1            | 28          | 0           | 0           | 0             | 0             | 0             |
| 65         | 0            | 0            | 0            | 0            | 0            | 0            | 0           | 0           | 0           | 0             | 0             | 0             |
| 66         | 0            | 0            | 0            | 0            | 0            | 0            | 0           | 298         | 0           | 0             | 0             | 0             |
| 67         | 0            | 0            | 0            | 0            | 0            | 0            | 0           | 0           | 0           | 0             | 0             | 296           |
| 68         | 0            | 0            | 0            | 0            | 0            | 0            | 0           | 0           | 0           | 0             | 289           | 0             |
| 69         | 0            | 0            | 0            | 0            | 0            | 0            | 0           | 0           | 0           | 0             | 0             | 274           |
| 70         | 0            | 0            | 0            | 0            | 0            | 0            | 0           | 0           | 0           | 272           | 0             | 0             |
| 71         | 0            | 0            | 0            | 0            | 0            | 0            | 0           | 0           | 0           | 0             | 0             | 268           |
| 72         | 0            | 0            | 0            | 0            | 0            | 0            | 0           | 0           | 0           | 0             | 265           | 0             |
| 73         | 57           | 67           | 14           | 8            | 9            | 7            | 0           | 0           | 0           | 0             | 0             | 0             |
| 74         | 0            | 0            | 0            | 0            | 0            | 0            | 0           | 0           | 0           | 0             | 0             | 0             |
| 75         | 0            | 0            | 0            | 0            | 0            | 0            | 0           | 0           | 260         | 0             | 0             | 0             |
| 76         | 0            | 0            | 0            | 0            | 0            | 0            | 0           | 0           | 0           | 251           | 0             | 0             |
| 77         | 0            | 0            | 0            | 0            | 0            | 0            | 0           | 0           | 0           | 0             | 248           | 0             |
| 78         | 11           | 9            | 0            | 0            | 1            | 0            | 0           | 0           | 0           | 0             | 0             | 0             |
| 79         | 0            | 0            | 0            | 2            | 3            | 2            | 0           | 0           | 0           | 0             | 0             | 0             |
| 80         | 12           | 5            | 5            | 11           | 13           | 53           | 0           | 0           | 0           | 0             | 0             | 0             |
| 81         | 0            | 0            | 0            | 0            | 0            | 0            | 0           | 0           | 225         | 0             | 0             | 0             |
| 82         | 0            | 0            | 0            | 0            | 0            | 0            | 0           | 0           | 0           | 0             | 0             | 0             |
| 83         | 3            | 4            | 0            | 3            | 2            | 2            | 28          | 0           | 0           | 0             | 0             | 0             |
| 84         | 0            | 0            | 0            | 0            | 0            | 0            | 0           | 0           | 0           | 0             | 0             | 218           |
| 85         | 0            | 0            | 0            | 0            | 0            | 0            | 0           | 218         | 0           | 0             | 0             | 0             |
| 86         | 0            | 0            | 0            | 0            | 0            | 0            | 0           | 0           | 0           | 0             | 0             | 0             |
| 87         | 0            | 0            | 0            | 0            | 0            | 0            | 0           | 0           | 212         | 0             | 0             | 0             |
| 88         | 0            | 0            | 0            | 0            | 0            | 0            | 0           | 0           | 0           | 207           | 0             | 0             |
| 89         | 1            | 204          | 0            | 0            | 0            | 2            | 0           | 0           | 0           | 0             | 0             | 0             |
| 90         | 0            | 0            | 0            | 0            | 0            | 0            | 0           | 202         | 0           | 0             | 0             | 0             |

| OTU Number | 7.11.15 Rep1 | 7.11.15 Rep2 | 7.11.15 Rep3 | 8.29.15 Rep1 | 8.29.15 Rep2 | 8.29.15 Rep3 | 2.6.16 Rep1 | 2.6.16 Rep2 | 2.6.16 Rep3 | 12.10.16 Rep1 | 12.10.16 Rep2 | 12.10.16 Rep3 |
|------------|--------------|--------------|--------------|--------------|--------------|--------------|-------------|-------------|-------------|---------------|---------------|---------------|
| 91         | 0            | 0            | 0            | 0            | 0            | 0            | 0           | 0           | 0           | 0             | 193           | 0             |
| 92         | 0            | 6            | 0            | 1            | 21           | 19           | 0           | 0           | 0           | 0             | 0             | 0             |
| 93         | 0            | 0            | 0            | 0            | 0            | 0            | 0           | 0           | 0           | 192           | 0             | 0             |
| 94         | 0            | 0            | 0            | 0            | 0            | 0            | 0           | 0           | 0           | 0             | 0             | 191           |
| 95         | 0            | 0            | 0            | 0            | 0            | 0            | 0           | 0           | 0           | 0             | 0             | 0             |
| 96         | 0            | 0            | 0            | 0            | 0            | 0            | 0           | 0           | 0           | 0             | 0             | 0             |
| 97         | 0            | 0            | 0            | 0            | 0            | 0            | 0           | 0           | 0           | 0             | 0             | 177           |
| 98         | 34           | 12           | 7            | 2            | 11           | 0            | 0           | 0           | 0           | 0             | 0             | 0             |
| 99         | 0            | 0            | 0            | 0            | 0            | 0            | 0           | 0           | 0           | 0             | 0             | 174           |
| 100        | 22           | 12           | 14           | 2            | 4            | 0            | 0           | 0           | 0           | 0             | 0             | 0             |
| 101        | 0            | 0            | 0            | 0            | 0            | 0            | 0           | 0           | 0           | 0             | 0             | 173           |
| 102        | 0            | 0            | 0            | 0            | 0            | 0            | 0           | 0           | 0           | 0             | 171           | 0             |
| 103        | 0            | 3            | 0            | 2            | 4            | 33           | 0           | 0           | 0           | 0             | 0             | 0             |
| 104        | 0            | 0            | 0            | 0            | 0            | 0            | 0           | 163         | 0           | 0             | 0             | 0             |
| 105        | 0            | 0            | 0            | 0            | 0            | 0            | 0           | 0           | 155         | 0             | 0             | 0             |
| 106        | 0            | 0            | 0            | 0            | 0            | 0            | 0           | 0           | 152         | 0             | 0             | 0             |
| 107        | 0            | 0            | 0            | 0            | 0            | 0            | 0           | 0           | 0           | 0             | 0             | 150           |
| 108        | 1            | 0            | 0            | 2            | 1            | 0            | 26          | 0           | 0           | 0             | 0             | 0             |
| 109        | 0            | 131          | 0            | 0            | 0            | 0            | 0           | 0           | 0           | 0             | 0             | 0             |
| 110        | 0            | 0            | 0            | 0            | 0            | 0            | 0           | 141         | 0           | 0             | 0             | 0             |
| 111        | 1            | 0            | 0            | 3            | 45           | 16           | 0           | 0           | 0           | 0             | 0             | 0             |
| 112        | 6            | 101          | 3            | 0            | 0            | 0            | 0           | 0           | 0           | 0             | 0             | 0             |
| 113        | 0            | 0            | 0            | 0            | 0            | 0            | 0           | 0           | 136         | 0             | 0             | 0             |
| 114        | 0            | 0            | 0            | 0            | 0            | 0            | 0           | 0           | 0           | 0             | 0             | 0             |
| 115        | 0            | 0            | 0            | 0            | 0            | 0            | 0           | 0           | 0           | 0             | 131           | 0             |
| 116        | 0            | 0            | 0            | 0            | 0            | 0            | 0           | 0           | 0           | 0             | 0             | 131           |
| 117        | 0            | 0            | 0            | 0            | 65           | 4            | 0           | 0           | 0           | 0             | 0             | 0             |
| 118        | 4            | 4            | 2            | 1            | 5            | 3            | 0           | 0           | 0           | 0             | 0             | 0             |
| 119        | 11           | 9            | 3            | 1            | 15           | 10           | 0           | 0           | 0           | 0             | 0             | 0             |
| 120        | 0            | 0            | 0            | 0            | 0            | 0            | 0           | 0           | 0           | 0             | 125           | 0             |
| 121        | 6            | 0            | 19           | 20           | 30           | 30           | 0           | 0           | 0           | 0             | 0             | 0             |
| 122        | 0            | 0            | 0            | 0            | 0            | 0            | 0           | 0           | 0           | 0             | 0             | 119           |
| 123        | 25           | 26           | 6            | 2            | 7            | 8            | 0           | 0           | 0           | 0             | 0             | 0             |
| 124        | 0            | 0            | 0            | 0            | 0            | 0            | 0           | 0           | 0           | 0             | 0             | 0             |
| 125        | 0            | 0            | 0            | 0            | 0            | 0            | 0           | 0           | 0           | 0             | 0             | 112           |
| 126        | 0            | 0            | 0            | 0            | 0            | 0            | 0           | 0           | 0           | 0             | 0             | 111           |
| 127        | 0            | 0            | 0            | 0            | 0            | 0            | 0           | 0           | 111         | 0             | 0             | 0             |
| 128        | 0            | 0            | 0            | 0            | 0            | 0            | 0           | 0           | 0           | 0             | 0             | 110           |
| 129        | 0            | 0            | 0            | 0            | 0            | 0            | 0           | 0           | 0           | 0             | 0             | 109           |
| 130        | 1            | 3            | 0            | 6            | 2            | 2            | 2           | 0           | 0           | 0             | 0             | 0             |
| 131        | 1            | 1            | 1            | 0            | 1            | 0            | 16          | 0           | 0           | 0             | 0             | 0             |
| 132        | 0            | 0            | 0            | 0            | 0            | 0            | 0           | 0           | 0           | 104           | 0             | 0             |
| 133        | 0            | 0            | 0            | 0            | 0            | 0            | 0           | 0           | 0           | 0             | 103           | 0             |
| 134        | 0            | 0            | 0            | 0            | 0            | 0            | 0           | 0           | 0           | 102           | 0             | 0             |
| 135        | 0            | 1            | 3            | 10           | 27           | 44           | 0           | 0           | 0           | 0             | 0             | 0             |

| OTU Number | 7.11.15 Rep1 | 7.11.15 Rep2 | 7.11.15 Rep3 | 8.29.15 Rep1 | 8.29.15 Rep2 | 8.29.15 Rep3 | 2.6.16 Rep1 | 2.6.16 Rep2 | 2.6.16 Rep3 | 12.10.16 Rep1 | 12.10.16 Rep2 | 12.10.16 Rep3 |
|------------|--------------|--------------|--------------|--------------|--------------|--------------|-------------|-------------|-------------|---------------|---------------|---------------|
| 136        | 0            | 0            | 2            | 29           | 36           | 29           | 0           | 0           | 0           | 0             | 0             | 0             |
| 137        | 0            | 0            | 0            | 0            | 0            | 0            | 0           | 0           | 0           | 0             | 0             | 0             |
| 138        | 0            | 0            | 0            | 0            | 0            | 0            | 0           | 0           | 0           | 0             | 0             | 0             |
| 139        | 1            | 0            | 0            | 20           | 12           | 3            | 0           | 0           | 0           | 0             | 0             | 0             |
| 140        | 0            | 0            | 0            | 0            | 0            | 0            | 0           | 0           | 0           | 0             | 97            | 0             |
| 141        | 1            | 4            | 0            | 1            | 1            | 0            | 0           | 0           | 0           | 0             | 0             | 0             |
| 142        | 0            | 0            | 0            | 0            | 0            | 0            | 0           | 0           | 0           | 0             | 0             | 94            |
| 143        | 0            | 0            | 1            | 26           | 17           | 47           | 0           | 0           | 0           | 0             | 0             | 0             |
| 144        | 0            | 0            | 0            | 0            | 0            | 0            | 0           | 0           | 0           | 0             | 93            | 0             |
| 145        | 21           | 15           | 6            | 6            | 9            | 1            | 0           | 0           | 0           | 0             | 0             | 0             |
| 146        | 0            | 0            | 0            | 0            | 0            | 0            | 0           | 0           | 0           | 0             | 91            | 0             |
| 147        | 0            | 0            | 0            | 0            | 0            | 0            | 0           | 0           | 0           | 0             | 90            | 0             |
| 148        | 5            | 0            | 15           | 18           | 15           | 19           | 0           | 0           | 0           | 0             | 0             | 0             |
| 149        | 0            | 0            | 0            | 0            | 0            | 0            | 0           | 0           | 0           | 87            | 0             | 0             |
| 150        | 0            | 1            | 0            | 0            | 13           | 33           | 0           | 0           | 0           | 0             | 0             | 0             |
| 151        | 0            | 0            | 0            | 0            | 0            | 0            | 0           | 0           | 0           | 0             | 0             | 86            |
| 152        | 0            | 2            | 0            | 0            | 0            | 0            | 7           | 0           | 0           | 0             | 0             | 0             |
| 153        | 0            | 0            | 0            | 0            | 1            | 2            | 6           | 0           | 0           | 0             | 0             | 0             |
| 154        | 36           | 18           | 6            | 0            | 1            | 0            | 0           | 0           | 0           | 0             | 0             | 0             |
| 155        | 0            | 0            | 0            | 0            | 0            | 0            | 0           | 0           | 0           | 0             | 0             | 0             |
| 156        | 1            | 3            | 0            | 0            | 1            | 0            | 13          | 0           | 0           | 0             | 0             | 0             |
| 157        | 0            | 0            | 0            | 0            | 0            | 0            | 0           | 0           | 0           | 0             | 0             | 81            |
| 158        | 0            | 0            | 1            | 1            | 1            | 3            | 0           | 0           | 0           | 0             | 0             | 0             |
| 159        | 2            | 1            | 3            | 8            | 12           | 44           | 0           | 0           | 0           | 0             | 0             | 0             |
| 160        | 18           | 27           | 5            | 1            | 3            | 4            | 0           | 0           | 0           | 0             | 0             | 0             |
| 161        | 6            | 53           | 0            | 0            | 0            | 0            | 0           | 0           | 0           | 0             | 0             | 0             |
| 162        | 0            | 0            | 0            | 0            | 0            | 0            | 0           | 0           | 0           | 0             | 0             | 77            |
| 163        | 0            | 0            | 0            | 0            | 0            | 0            | 0           | 0           | 0           | 0             | 0             | 77            |
| 164        | 0            | 0            | 0            | 0            | 0            | 0            | 0           | 0           | 0           | 0             | 77            | 0             |
| 165        | 0            | 0            | 0            | 0            | 0            | 0            | 0           | 0           | 0           | 0             | 76            | 0             |
| 166        | 0            | 0            | 0            | 0            | 0            | 0            | 0           | 0           | 0           | 0             | 0             | 76            |
| 167        | 0            | 1            | 0            | 0            | 0            | 0            | 0           | 0           | 0           | 0             | 0             | 0             |
| 168        | 0            | 0            | 0            | 0            | 0            | 0            | 0           | 0           | 0           | 0             | 0             | 0             |
| 169        | 0            | 0            | 0            | 0            | 0            | 0            | 0           | 0           | 0           | 0             | 0             | 68            |
| 170        | 0            | 0            | 0            | 0            | 0            | 0            | 0           | 0           | 0           | 0             | 67            | 0             |
| 171        | 0            | 0            | 0            | 0            | 0            | 0            | 0           | 0           | 0           | 0             | 66            | 0             |
| 172        | 0            | 0            | 0            | 0            | 0            | 0            | 0           | 0           | 0           | 0             | 65            | 0             |
| 173        | 0            | 0            | 0            | 0            | 0            | 0            | 0           | 0           | 0           | 65            | 0             | 0             |
| 174        | 0            | 0            | 0            | 0            | 0            | 0            | 0           | 0           | 0           | 0             | 64            | 0             |
| 175        | 0            | 0            | 0            | 0            | 0            | 0            | 0           | 0           | 0           | 0             | 64            | 0             |
| 176        | 1            | 2            | 1            | 1            | 7            | 0            | 0           | 0           | 0           | 0             | 0             | 0             |
| 177        | 0            | 0            | 0            | 0            | 0            | 0            | 0           | 0           | 0           | 0             | 62            | 0             |
| 178        | 0            | 0            | 0            | 0            | 0            | 0            | 0           | 0           | 0           | 0             | 0             | 62            |
| 179        | 2            | 57           | 0            | 0            | 0            | 0            | 0           | 0           | 0           | 0             | 0             | 0             |
| 180        | 0            | 0            | 0            | 0            | 0            | 0            | 0           | 0           | 0           | 60            | 0             | 0             |







| OTU Number | 7.11.15 Rep1 | 7.11.15 Rep2 | 7.11.15 Rep3 | 8.29.15 Rep1 | 8.29.15 Rep2 | 8.29.15 Rep3 | 2.6.16 Rep1 | 2.6.16 Rep2 | 2.6.16 Rep3 | 12.10.16 Rep1 | 12.10.16 Rep2 | 12.10.16 Rep3 |
|------------|--------------|--------------|--------------|--------------|--------------|--------------|-------------|-------------|-------------|---------------|---------------|---------------|
| 316        | 0            | 0            | 0            | 1            | 0            | 0            | 0           | 0           | 0           | 0             | 0             | 0             |
| 317        | 0            | 0            | 0            | 0            | 0            | 0            | 0           | 0           | 0           | 0             | 25            | 0             |
| 318        | 0            | 0            | 0            | 0            | 0            | 0            | 0           | 25          | 0           | 0             | 0             | 0             |
| 319        | 0            | 0            | 0            | 1            | 12           | 2            | 0           | 0           | 0           | 0             | 0             | 0             |
| 320        | 0            | 0            | 0            | 0            | 0            | 0            | 0           | 0           | 0           | 0             | 0             | 0             |
| 321        | 0            | 0            | 0            | 0            | 0            | 0            | 0           | 0           | 0           | 0             | 0             | 24            |
| 322        | 0            | 0            | 0            | 0            | 0            | 0            | 0           | 0           | 0           | 0             | 0             | 24            |
| 323        | 0            | 0            | 0            | 0            | 0            | 0            | 0           | 0           | 0           | 0             | 0             | 24            |
| 324        | 0            | 0            | 0            | 0            | 0            | 0            | 0           | 0           | 0           | 0             | 24            | 0             |
| 325        | 0            | 0            | 0            | 0            | 0            | 0            | 0           | 0           | 0           | 0             | 0             | 0             |
| 326        | 0            | 0            | 0            | 0            | 0            | 0            | 0           | 0           | 0           | 24            | 0             | 0             |
| 327        | 0            | 0            | 0            | 0            | 0            | 0            | 0           | 0           | 0           | 0             | 24            | 0             |
| 328        | 0            | 0            | 0            | 0            | 0            | 0            | 0           | 24          | 0           | 0             | 0             | 0             |
| 329        | 2            | 1            | 9            | 1            | 2            | 4            | 0           | 0           | 0           | 0             | 0             | 0             |
| 330        | 0            | 0            | 0            | 0            | 0            | 0            | 0           | 0           | 0           | 0             | 0             | 0             |
| 331        | 0            | 0            | 0            | 0            | 0            | 0            | 0           | 0           | 0           | 0             | 0             | 0             |
| 332        | 0            | 0            | 0            | 0            | 0            | 0            | 0           | 0           | 0           | 0             | 0             | 0             |
| 333        | 0            | 0            | 0            | 0            | 0            | 0            | 0           | 23          | 0           | 0             | 0             | 0             |
| 334        | 0            | 0            | 0            | 0            | 0            | 0            | 0           | 0           | 0           | 0             | 23            | 0             |
| 335        | 0            | 0            | 0            | 0            | 0            | 0            | 0           | 0           | 0           | 0             | 0             | 23            |
| 336        | 1            | 0            | 0            | 4            | 12           | 6            | 0           | 0           | 0           | 0             | 0             | 0             |
| 337        | 0            | 0            | 0            | 0            | 0            | 0            | 0           | 0           | 0           | 0             | 0             | 23            |
| 338        | 1            | 0            | 0            | 4            | 3            | 8            | 0           | 0           | 0           | 0             | 0             | 0             |
| 339        | 0            | 0            | 0            | 0            | 0            | 0            | 0           | 0           | 0           | 0             | 0             | 0             |
| 340        | 0            | 0            | 0            | 0            | 0            | 0            | 0           | 0           | 0           | 0             | 0             | 0             |
| 341        | 0            | 0            | 0            | 0            | 0            | 0            | 0           | 0           | 0           | 0             | 0             | 23            |
| 342        | 0            | 0            | 0            | 0            | 0            | 0            | 0           | 0           | 0           | 0             | 0             | 0             |
| 343        | 0            | 0            | 0            | 0            | 0            | 0            | 0           | 0           | 0           | 0             | 0             | 0             |
| 344        | 0            | 0            | 0            | 0            | 0            | 0            | 0           | 23          | 0           | 0             | 0             | 0             |
| 345        | 2            | 0            | 0            | 0            | 3            | 1            | 0           | 0           | 0           | 0             | 0             | 0             |
| 346        | 0            | 0            | 0            | 0            | 1            | 0            | 0           | 0           | 0           | 0             | 0             | 0             |
| 347        | 0            | 0            | 0            | 0            | 0            | 0            | 0           | 0           | 0           | 0             | 22            | 0             |
| 348        | 0            | 0            | 0            | 0            | 0            | 0            | 0           | 0           | 0           | 0             | 22            | 0             |
| 349        | 0            | 0            | 0            | 0            | 0            | 0            | 0           | 0           | 0           | 22            | 0             | 0             |
| 350        | 0            | 0            | 0            | 0            | 0            | 0            | 0           | 0           | 0           | 22            | 0             | 0             |
| 351        | 0            | 0            | 0            | 0            | 0            | 0            | 0           | 22          | 0           | 0             | 0             | 0             |
| 352        | 0            | 22           | 0            | 0            | 0            | 0            | 0           | 0           | 0           | 0             | 0             | 0             |
| 353        | 0            | 0            | 0            | 0            | 0            | 0            | 0           | 0           | 0           | 22            | 0             | 0             |
| 354        | 0            | 0            | 0            | 0            | 0            | 0            | 0           | 0           | 0           | 0             | 0             | 0             |
| 355        | 0            | 0            | 0            | 0            | 0            | 0            | 0           | 0           | 0           | 22            | 0             | 0             |
| 356        | 0            | 0            | 0            | 0            | 0            | 0            | 0           | 0           | 0           | 0             | 0             | 22            |
| 357        | 0            | 0            | 0            | 0            | 0            | 0            | 0           | 0           | 0           | 0             | 0             | 0             |
| 358        | 0            | 0            | 0            | 0            | 0            | 0            | 0           | 22          | 0           | 0             | 0             | 0             |
| 359        | 0            | 0            | 0            | 0            | 0            | 0            | 0           | 22          | 0           | 0             | 0             | 0             |
| 360        | 0            | 0            | 0            | 0            | 0            | 0            | 0           | 0           | 22          | 0             | 0             | 0             |



| OTU Number | 7.11.15 Rep1 | 7.11.15 Rep2 | 7.11.15 Rep3 | 8.29.15 Rep1 | 8.29.15 Rep2 | 8.29.15 Rep3 | 2.6.16 Rep1 | 2.6.16 Rep2 | 2.6.16 Rep3 | 12.10.16 Rep1 | 12.10.16 Rep2 | 12.10.16 Rep3 |
|------------|--------------|--------------|--------------|--------------|--------------|--------------|-------------|-------------|-------------|---------------|---------------|---------------|
| 361        | 0            | 0            | 0            | 0            | 0            | 0            | 0           | 0           | 0           | 0             | 0             | 0             |
| 362        | 0            | 0            | 0            | 0            | 0            | 0            | 0           | 0           | 0           | 0             | 0             | 0             |
| 363        | 0            | 0            | 0            | 0            | 0            | 0            | 0           | 0           | 0           | 0             | 22            | 0             |
| 364        | 0            | 0            | 0            | 0            | 0            | 0            | 0           | 0           | 0           | 0             | 0             | 0             |
| 365        | 0            | 0            | 0            | 0            | 0            | 0            | 0           | 0           | 0           | 0             | 22            | 0             |
| 366        | 0            | 0            | 0            | 0            | 0            | 0            | 0           | 0           | 21          | 0             | 0             | 0             |
| 367        | 0            | 0            | 0            | 0            | 0            | 0            | 0           | 0           | 0           | 21            | 0             | 0             |
| 368        | 0            | 0            | 0            | 0            | 0            | 0            | 0           | 0           | 0           | 21            | 0             | 0             |
| 369        | 0            | 0            | 0            | 0            | 0            | 0            | 0           | 21          | 0           | 0             | 0             | 0             |
| 370        | 0            | 0            | 0            | 0            | 0            | 0            | 0           | 21          | 0           | 0             | 0             | 0             |
| 371        | 0            | 0            | 0            | 0            | 0            | 0            | 0           | 0           | 0           | 0             | 0             | 0             |
| 372        | 0            | 0            | 0            | 0            | 0            | 0            | 0           | 0           | 0           | 21            | 0             | 0             |
| 373        | 0            | 0            | 0            | 0            | 0            | 0            | 0           | 0           | 0           | 21            | 0             | 0             |
| 374        | 0            | 0            | 0            | 0            | 0            | 0            | 0           | 0           | 21          | 0             | 0             | 0             |
| 375        | 0            | 0            | 0            | 0            | 0            | 0            | 0           | 0           | 21          | 0             | 0             | 0             |
| 376        | 0            | 0            | 0            | 0            | 0            | 0            | 0           | 0           | 0           | 0             | 0             | 0             |
| 377        | 6            | 5            | 2            | 1            | 2            | 0            | 0           | 0           | 0           | 0             | 0             | 0             |
| 378        | 0            | 0            | 0            | 0            | 0            | 0            | 0           | 0           | 0           | 0             | 0             | 0             |
| 379        | 0            | 0            | 0            | 0            | 8            | 0            | 0           | 0           | 0           | 0             | 0             | 0             |
| 380        | 0            | 0            | 0            | 0            | 0            | 0            | 0           | 0           | 21          | 0             | 0             | 0             |
| 381        | 0            | 0            | 0            | 0            | 0            | 0            | 0           | 0           | 0           | 0             | 0             | 0             |
| 382        | 0            | 1            | 0            | 0            | 0            | 0            | 0           | 0           | 0           | 0             | 0             | 0             |
| 383        | 0            | 0            | 0            | 0            | 0            | 0            | 0           | 0           | 20          | 0             | 0             | 0             |
| 384        | 1            | 0            | 0            | 0            | 3            | 5            | 0           | 0           | 0           | 0             | 0             | 0             |
| 385        | 0            | 0            | 0            | 0            | 0            | 0            | 0           | 0           | 0           | 0             | 0             | 0             |
| 386        | 0            | 0            | 0            | 0            | 0            | 0            | 0           | 0           | 0           | 0             | 20            | 0             |
| 387        | 0            | 0            | 0            | 0            | 0            | 0            | 0           | 20          | 0           | 0             | 0             | 0             |
| 388        | 0            | 0            | 0            | 0            | 0            | 0            | 0           | 0           | 0           | 0             | 20            | 0             |
| 389        | 0            | 0            | 0            | 0            | 1            | 0            | 0           | 0           | 0           | 0             | 0             | 0             |
| 390        | 0            | 0            | 0            | 0            | 0            | 0            | 0           | 0           | 0           | 0             | 0             | 0             |
| 391        | 0            | 0            | 0            | 0            | 0            | 0            | 0           | 0           | 0           | 0             | 0             | 0             |
| 392        | 0            | 0            | 0            | 0            | 0            | 0            | 0           | 0           | 0           | 0             | 20            | 0             |
| 393        | 0            | 20           | 0            | 0            | 0            | 0            | 0           | 0           | 0           | 0             | 0             | 0             |
| 394        | 0            | 0            | 0            | 0            | 0            | 0            | 0           | 0           | 0           | 0             | 0             | 0             |
| 395        | 0            | 0            | 0            | 0            | 0            | 0            | 0           | 0           | 0           | 0             | 0             | 0             |
| 396        | 0            | 1            | 0            | 0            | 0            | 0            | 0           | 0           | 0           | 0             | 0             | 0             |
| 397        | 0            | 0            | 0            | 0            | 0            | 0            | 0           | 0           | 0           | 19            | 0             | 0             |
| 398        | 0            | 0            | 0            | 0            | 0            | 0            | 0           | 0           | 0           | 0             | 0             | 19            |
| 399        | 0            | 0            | 0            | 0            | 0            | 0            | 0           | 0           | 0           | 0             | 0             | 0             |
| 400        | 0            | 0            | 0            | 0            | 0            | 0            | 0           | 0           | 0           | 19            | 0             | 0             |
| 401        | 0            | 2            | 0            | 0            | 0            | 0            | 0           | 0           | 0           | 0             | 0             | 0             |
| 402        | 0            | 0            | 0            | 0            | 0            | 0            | 0           | 0           | 19          | 0             | 0             | 0             |
| 403        | 0            | 0            | 0            | 0            | 0            | 0            | 0           | 0           | 19          | 0             | 0             | 0             |
| 404        | 0            | 0            | 0            | 0            | 0            | 0            | 0           | 19          | 0           | 0             | 0             | 0             |
| 405        | 2            | 6            | 1            | 0            | 0            | 1            | 0           | 0           | 0           | 0             | 0             | 0             |

| OTU Number | 7.11.15 Rep1 | 7.11.15 Rep2 | 7.11.15 Rep3 | 8.29.15 Rep1 | 8.29.15 Rep2 | 8.29.15 Rep3 | 2.6.16 Rep1 | 2.6.16 Rep2 | 2.6.16 Rep3 | 12.10.16 Rep1 | 12.10.16 Rep2 | 12.10.16 Rep3 |
|------------|--------------|--------------|--------------|--------------|--------------|--------------|-------------|-------------|-------------|---------------|---------------|---------------|
| 406        | 0            | 0            | 0            | 0            | 0            | 0            | 0           | 0           | 19          | 0             | 0             | 0             |
| 407        | 0            | 0            | 0            | 0            | 0            | 0            | 0           | 0           | 19          | 0             | 0             | 0             |
| 408        | 0            | 0            | 0            | 0            | 0            | 0            | 0           | 0           | 0           | 19            | 0             | 0             |
| 409        | 0            | 0            | 0            | 0            | 0            | 0            | 0           | 0           | 0           | 0             | 0             | 0             |
| 410        | 2            | 3            | 1            | 4            | 3            | 1            | 0           | 0           | 0           | 0             | 0             | 0             |
| 411        | 0            | 0            | 0            | 0            | 0            | 0            | 0           | 0           | 19          | 0             | 0             | 0             |
| 412        | 0            | 0            | 0            | 0            | 0            | 0            | 0           | 0           | 0           | 0             | 0             | 0             |
| 413        | 0            | 0            | 0            | 0            | 0            | 0            | 0           | 0           | 0           | 0             | 0             | 0             |
| 414        | 5            | 8            | 0            | 0            | 0            | 1            | 0           | 0           | 0           | 0             | 0             | 0             |
| 415        | 0            | 0            | 0            | 0            | 0            | 0            | 0           | 0           | 0           | 0             | 0             | 0             |
| 416        | 0            | 0            | 0            | 0            | 0            | 0            | 0           | 0           | 19          | 0             | 0             | 0             |
| 417        | 0            | 1            | 0            | 0            | 2            | 0            | 0           | 0           | 0           | 0             | 0             | 0             |
| 418        | 0            | 0            | 0            | 0            | 0            | 0            | 0           | 0           | 0           | 19            | 0             | 0             |
| 419        | 0            | 0            | 0            | 0            | 0            | 0            | 0           | 0           | 0           | 0             | 0             | 0             |
| 420        | 0            | 0            | 0            | 0            | 0            | 0            | 0           | 0           | 0           | 0             | 18            | 0             |
| 421        | 0            | 0            | 0            | 0            | 0            | 0            | 0           | 0           | 0           | 0             | 0             | 0             |
| 422        | 0            | 0            | 0            | 0            | 0            | 0            | 0           | 0           | 18          | 0             | 0             | 0             |
| 423        | 1            | 15           | 0            | 0            | 0            | 0            | 0           | 0           | 0           | 0             | 0             | 0             |
| 424        | 0            | 0            | 0            | 0            | 0            | 0            | 0           | 0           | 18          | 0             | 0             | 0             |
| 425        | 0            | 0            | 0            | 0            | 0            | 0            | 0           | 0           | 0           | 0             | 0             | 0             |
| 426        | 0            | 0            | 0            | 0            | 0            | 0            | 0           | 0           | 0           | 0             | 0             | 0             |
| 427        | 0            | 0            | 0            | 0            | 0            | 0            | 0           | 0           | 0           | 0             | 18            | 0             |
| 428        | 0            | 1            | 1            | 2            | 0            | 0            | 0           | 0           | 0           | 0             | 0             | 0             |
| 429        | 0            | 0            | 0            | 0            | 0            | 0            | 0           | 0           | 18          | 0             | 0             | 0             |
| 430        | 0            | 0            | 0            | 0            | 0            | 0            | 0           | 0           | 0           | 0             | 0             | 0             |
| 431        | 0            | 0            | 0            | 0            | 0            | 0            | 0           | 0           | 0           | 0             | 18            | 0             |
| 432        | 0            | 0            | 0            | 0            | 0            | 0            | 0           | 0           | 0           | 18            | 0             | 0             |
| 433        | 0            | 0            | 0            | 0            | 0            | 0            | 0           | 0           | 0           | 0             | 0             | 0             |
| 434        | 0            | 0            | 0            | 0            | 0            | 0            | 0           | 0           | 0           | 0             | 0             | 0             |
| 435        | 0            | 0            | 0            | 0            | 0            | 0            | 0           | 0           | 0           | 0             | 0             | 0             |
| 436        | 0            | 0            | 0            | 0            | 0            | 0            | 0           | 0           | 0           | 18            | 0             | 0             |
| 437        | 0            | 0            | 0            | 0            | 0            | 0            | 0           | 0           | 0           | 0             | 0             | 0             |
| 438        | 0            | 0            | 0            | 0            | 0            | 0            | 0           | 0           | 18          | 0             | 0             | 0             |
| 439        | 0            | 6            | 0            | 0            | 0            | 0            | 0           | 0           | 0           | 0             | 0             | 0             |
| 440        | 0            | 0            | 0            | 0            | 0            | 0            | 0           | 0           | 0           | 0             | 0             | 18            |
| 441        | 0            | 0            | 0            | 0            | 0            | 0            | 0           | 0           | 0           | 0             | 0             | 18            |
| 442        | 0            | 0            | 0            | 0            | 0            | 0            | 0           | 0           | 0           | 18            | 0             | 0             |
| 443        | 1            | 0            | 0            | 0            | 0            | 0            | 0           | 0           | 0           | 0             | 0             | 0             |
| 444        | 0            | 0            | 0            | 0            | 0            | 0            | 0           | 0           | 0           | 18            | 0             | 0             |
| 445        | 0            | 0            | 0            | 0            | 0            | 0            | 0           | 0           | 0           | 0             | 0             | 18            |
| 446        | 0            | 0            | 0            | 0            | 0            | 0            | 0           | 0           | 18          | 0             | 0             | 0             |
| 447        | 0            | 0            | 0            | 0            | 0            | 0            | 0           | 0           | 0           | 0             | 18            | 0             |
| 448        | 0            | 0            | 0            | 0            | 0            | 0            | 0           | 0           | 0           | 0             | 0             | 0             |
| 449        | 0            | 0            | 0            | 0            | 0            | 0            | 0           | 0           | 0           | 0             | 18            | 0             |
| 450        | 0            | 0            | 0            | 0            | 0            | 0            | 0           | 0           | 17          | 0             | 0             | 0             |



| OTU Number | 7.11.15 Rep1 | 7.11.15 Rep2 | 7.11.15 Rep3 | 8.29.15 Rep1 | 8.29.15 Rep2 | 8.29.15 Rep3 | 2.6.16 Rep1 | 2.6.16 Rep2 | 2.6.16 Rep3 | 12.10.16 Rep1 | 12.10.16 Rep2 | 12.10.16 Rep3 |
|------------|--------------|--------------|--------------|--------------|--------------|--------------|-------------|-------------|-------------|---------------|---------------|---------------|
| 496        | 0            | 0            | 0            | 0            | 0            | 0            | 0           | 16          | 0           | 0             | 0             | 0             |
| 497        | 0            | 0            | 0            | 0            | 0            | 0            | 0           | 0           | 0           | 0             | 0             | 0             |
| 498        | 0            | 0            | 0            | 0            | 2            | 1            | 0           | 0           | 0           | 0             | 0             | 0             |
| 499        | 0            | 0            | 0            | 0            | 0            | 0            | 0           | 16          | 0           | 0             | 0             | 0             |
| 500        | 0            | 0            | 0            | 0            | 0            | 0            | 0           | 0           | 0           | 0             | 16            | 0             |
| 501        | 0            | 0            | 0            | 0            | 0            | 0            | 0           | 0           | 0           | 16            | 0             | 0             |
| 502        | 0            | 0            | 0            | 0            | 0            | 0            | 0           | 0           | 16          | 0             | 0             | 0             |
| 503        | 0            | 0            | 0            | 0            | 0            | 0            | 0           | 0           | 0           | 0             | 0             | 16            |
| 504        | 0            | 0            | 0            | 0            | 0            | 0            | 0           | 0           | 0           | 16            | 0             | 0             |
| 505        | 9            | 4            | 0            | 0            | 0            | 0            | 0           | 0           | 0           | 0             | 0             | 0             |
| 506        | 0            | 0            | 0            | 0            | 0            | 0            | 0           | 0           | 0           | 0             | 0             | 0             |
| 507        | 0            | 0            | 0            | 0            | 0            | 0            | 0           | 0           | 0           | 0             | 0             | 16            |
| 508        | 0            | 0            | 0            | 0            | 0            | 0            | 0           | 0           | 0           | 0             | 0             | 0             |
| 509        | 1            | 0            | 0            | 0            | 0            | 0            | 0           | 0           | 0           | 0             | 0             | 0             |
| 510        | 0            | 0            | 0            | 0            | 0            | 0            | 0           | 0           | 0           | 15            | 0             | 0             |
| 511        | 0            | 0            | 0            | 0            | 0            | 0            | 0           | 0           | 0           | 0             | 0             | 0             |
| 512        | 0            | 0            | 0            | 3            | 3            | 4            | 0           | 0           | 0           | 0             | 0             | 0             |
| 513        | 0            | 0            | 0            | 0            | 0            | 0            | 0           | 0           | 0           | 0             | 0             | 0             |
| 514        | 0            | 0            | 0            | 0            | 0            | 1            | 0           | 0           | 0           | 0             | 0             | 0             |
| 515        | 0            | 0            | 0            | 0            | 0            | 0            | 0           | 0           | 0           | 0             | 0             | 0             |
| 516        | 0            | 0            | 0            | 0            | 0            | 0            | 0           | 0           | 15          | 0             | 0             | 0             |
| 517        | 0            | 0            | 0            | 0            | 0            | 0            | 0           | 0           | 0           | 0             | 0             | 0             |
| 518        | 0            | 15           | 0            | 0            | 0            | 0            | 0           | 0           | 0           | 0             | 0             | 0             |
| 519        | 0            | 0            | 0            | 0            | 0            | 0            | 0           | 0           | 0           | 0             | 0             | 15            |
| 520        | 0            | 0            | 0            | 0            | 0            | 0            | 0           | 0           | 0           | 15            | 0             | 0             |
| 521        | 2            | 2            | 2            | 0            | 0            | 0            | 0           | 0           | 0           | 0             | 0             | 0             |
| 522        | 0            | 0            | 0            | 0            | 0            | 0            | 0           | 15          | 0           | 0             | 0             | 0             |
| 523        | 0            | 0            | 0            | 0            | 0            | 0            | 0           | 0           | 0           | 0             | 0             | 0             |
| 524        | 0            | 0            | 0            | 0            | 0            | 0            | 0           | 15          | 0           | 0             | 0             | 0             |
| 525        | 0            | 0            | 0            | 0            | 0            | 0            | 0           | 0           | 0           | 0             | 0             | 0             |
| 526        | 0            | 0            | 0            | 0            | 0            | 0            | 0           | 0           | 0           | 15            | 0             | 0             |
| 527        | 0            | 0            | 0            | 0            | 0            | 0            | 0           | 0           | 0           | 0             | 0             | 0             |
| 528        | 0            | 0            | 0            | 0            | 0            | 0            | 0           | 15          | 0           | 0             | 0             | 0             |
| 529        | 0            | 0            | 0            | 0            | 0            | 0            | 0           | 0           | 0           | 0             | 0             | 0             |
| 530        | 0            | 0            | 0            | 0            | 0            | 0            | 0           | 15          | 0           | 0             | 0             | 0             |
| 531        | 0            | 0            | 0            | 0            | 0            | 0            | 0           | 0           | 15          | 0             | 0             | 0             |
| 532        | 0            | 0            | 0            | 0            | 0            | 0            | 0           | 0           | 0           | 15            | 0             | 0             |
| 533        | 0            | 0            | 0            | 0            | 0            | 0            | 0           | 0           | 15          | 0             | 0             | 0             |
| 534        | 0            | 0            | 0            | 0            | 0            | 0            | 0           | 0           | 0           | 0             | 0             | 0             |
| 535        | 0            | 0            | 0            | 0            | 0            | 0            | 0           | 0           | 15          | 0             | 0             | 0             |
| 536        | 0            | 0            | 0            | 0            | 0            | 0            | 0           | 0           | 0           | 0             | 0             | 15            |
| 537        | 0            | 0            | 0            | 0            | 0            | 0            | 0           | 0           | 0           | 0             | 0             | 0             |
| 538        | 0            | 0            | 0            | 0            | 0            | 0            | 0           | 0           | 0           | 0             | 15            | 0             |
| 539        | 0            | 0            | 0            | 0            | 0            | 0            | 0           | 0           | 0           | 15            | 0             | 0             |
| 540        | 0            | 0            | 0            | 0            | 0            | 0            | 0           | 0           | 0           | 14            | 0             | 0             |







| OTU Number | 7.11.15 Rep1 | 7.11.15 Rep2 | 7.11.15 Rep3 | 8.29.15 Rep1 | 8.29.15 Rep2 | 8.29.15 Rep3 | 2.6.16 Rep1 | 2.6.16 Rep2 | 2.6.16 Rep3 | 12.10.16 Rep1 | 12.10.16 Rep2 | 12.10.16 Rep3 |
|------------|--------------|--------------|--------------|--------------|--------------|--------------|-------------|-------------|-------------|---------------|---------------|---------------|
| 676        | 0            | 0            | 0            | 0            | 0            | 0            | 0           | 0           | 0           | 0             | 0             | 12            |
| 677        | 0            | 0            | 0            | 0            | 0            | 0            | 0           | 0           | 12          | 0             | 0             | 0             |
| 678        | 0            | 0            | 0            | 0            | 0            | 0            | 0           | 0           | 0           | 0             | 12            | 0             |
| 679        | 0            | 0            | 0            | 0            | 0            | 0            | 0           | 0           | 0           | 0             | 0             | 12            |
| 680        | 0            | 0            | 0            | 0            | 0            | 0            | 0           | 0           | 12          | 0             | 0             | 0             |
| 681        | 0            | 0            | 0            | 0            | 0            | 0            | 0           | 0           | 12          | 0             | 0             | 0             |
| 682        | 0            | 0            | 0            | 0            | 0            | 0            | 0           | 0           | 0           | 0             | 0             | 12            |
| 683        | 0            | 0            | 0            | 0            | 0            | 0            | 0           | 12          | 0           | 0             | 0             | 0             |
| 684        | 0            | 0            | 0            | 0            | 0            | 0            | 0           | 0           | 0           | 12            | 0             | 0             |
| 685        | 0            | 0            | 0            | 0            | 0            | 0            | 0           | 0           | 0           | 0             | 0             | 0             |
| 686        | 0            | 0            | 0            | 0            | 0            | 0            | 0           | 0           | 12          | 0             | 0             | 0             |
| 687        | 6            | 0            | 3            | 0            | 1            | 0            | 0           | 0           | 0           | 0             | 0             | 0             |
| 688        | 0            | 0            | 0            | 0            | 0            | 0            | 0           | 0           | 0           | 0             | 0             | 0             |
| 689        | 1            | 0            | 0            | 0            | 2            | 1            | 0           | 0           | 0           | 0             | 0             | 0             |
| 690        | 0            | 0            | 0            | 0            | 0            | 0            | 0           | 0           | 12          | 0             | 0             | 0             |
| 691        | 0            | 0            | 0            | 0            | 0            | 0            | 0           | 0           | 0           | 0             | 0             | 0             |
| 692        | 0            | 0            | 0            | 0            | 0            | 0            | 0           | 12          | 0           | 0             | 0             | 0             |
| 693        | 0            | 0            | 0            | 0            | 0            | 0            | 0           | 0           | 0           | 0             | 0             | 0             |
| 694        | 0            | 0            | 0            | 0            | 0            | 0            | 0           | 0           | 0           | 0             | 0             | 12            |
| 695        | 0            | 0            | 0            | 0            | 0            | 0            | 0           | 0           | 12          | 0             | 0             | 0             |
| 696        | 0            | 0            | 0            | 0            | 0            | 0            | 0           | 12          | 0           | 0             | 0             | 0             |
| 697        | 0            | 0            | 0            | 0            | 0            | 0            | 0           | 0           | 0           | 0             | 0             | 0             |
| 698        | 0            | 0            | 0            | 0            | 0            | 0            | 0           | 0           | 0           | 0             | 0             | 0             |
| 699        | 0            | 0            | 5            | 0            | 0            | 1            | 0           | 0           | 0           | 0             | 0             | 0             |
| 700        | 0            | 0            | 0            | 0            | 0            | 0            | 0           | 0           | 0           | 0             | 0             | 0             |
| 701        | 1            | 0            | 5            | 1            | 0            | 0            | 0           | 0           | 0           | 0             | 0             | 0             |
| 702        | 0            | 0            | 0            | 0            | 0            | 0            | 0           | 12          | 0           | 0             | 0             | 0             |
| 703        | 0            | 0            | 0            | 2            | 6            | 0            | 0           | 0           | 0           | 0             | 0             | 0             |
| 704        | 0            | 0            | 0            | 0            | 0            | 0            | 0           | 0           | 12          | 0             | 0             | 0             |
| 705        | 0            | 0            | 0            | 0            | 0            | 0            | 0           | 0           | 0           | 12            | 0             | 0             |
| 706        | 0            | 0            | 0            | 0            | 0            | 0            | 0           | 0           | 0           | 0             | 12            | 0             |
| 707        | 0            | 0            | 0            | 0            | 0            | 0            | 0           | 0           | 12          | 0             | 0             | 0             |
| 708        | 0            | 0            | 0            | 0            | 0            | 0            | 0           | 12          | 0           | 0             | 0             | 0             |
| 709        | 0            | 0            | 0            | 0            | 0            | 0            | 0           | 12          | 0           | 0             | 0             | 0             |
| 710        | 0            | 0            | 0            | 0            | 0            | 0            | 0           | 12          | 0           | 0             | 0             | 0             |
| 711        | 0            | 0            | 0            | 0            | 0            | 0            | 0           | 0           | 0           | 0             | 0             | 0             |
| 712        | 0            | 0            | 0            | 0            | 0            | 0            | 0           | 12          | 0           | 0             | 0             | 0             |
| 713        | 0            | 0            | 0            | 0            | 0            | 0            | 0           | 12          | 0           | 0             | 0             | 0             |
| 714        | 0            | 0            | 0            | 0            | 0            | 0            | 0           | 0           | 0           | 12            | 0             | 0             |
| 715        | 0            | 0            | 0            | 0            | 0            | 0            | 0           | 0           | 0           | 0             | 0             | 0             |
| 716        | 0            | 0            | 0            | 0            | 0            | 0            | 0           | 0           | 0           | 0             | 12            | 0             |
| 717        | 0            | 0            | 0            | 0            | 0            | 0            | 0           | 0           | 0           | 0             | 0             | 0             |
| 718        | 0            | 0            | 0            | 0            | 0            | 0            | 0           | 0           | 0           | 0             | 0             | 0             |
| 719        | 4            | 0            | 0            | 0            | 1            | 1            | 0           | 0           | 0           | 0             | 0             | 0             |
| 720        | 0            | 0            | 0            | 0            | 0            | 0            | 6           | 0           | 0           | 0             | 0             | 0             |





| OTU Number | 7.11.15 Rep1 | 7.11.15 Rep2 | 7.11.15 Rep3 | 8.29.15 Rep1 | 8.29.15 Rep2 | 8.29.15 Rep3 | 2.6.16 Rep1 | 2.6.16 Rep2 | 2.6.16 Rep3 | 12.10.16 Rep1 | 12.10.16 Rep2 | 12.10.16 Rep3 |
|------------|--------------|--------------|--------------|--------------|--------------|--------------|-------------|-------------|-------------|---------------|---------------|---------------|
| 766        | 0            | 0            | 0            | 0            | 0            | 0            | 0           | 11          | 0           | 0             | 0             | 0             |
| 767        | 0            | 0            | 0            | 0            | 0            | 0            | 0           | 11          | 0           | 0             | 0             | 0             |
| 768        | 0            | 0            | 0            | 0            | 0            | 0            | 0           | 0           | 0           | 0             | 0             | 0             |
| 769        | 0            | 0            | 0            | 0            | 0            | 0            | 0           | 0           | 0           | 0             | 0             | 0             |
| 770        | 2            | 0            | 0            | 0            | 0            | 0            | 0           | 0           | 0           | 0             | 0             | 0             |
| 771        | 0            | 0            | 0            | 0            | 2            | 1            | 0           | 0           | 0           | 0             | 0             | 0             |
| 772        | 0            | 0            | 0            | 0            | 0            | 0            | 0           | 0           | 11          | 0             | 0             | 0             |
| 773        | 0            | 0            | 0            | 0            | 0            | 0            | 0           | 0           | 0           | 0             | 0             | 11            |
| 774        | 0            | 0            | 0            | 0            | 0            | 0            | 0           | 0           | 0           | 0             | 0             | 0             |
| 775        | 0            | 0            | 0            | 0            | 0            | 0            | 0           | 0           | 0           | 0             | 11            | 0             |
| 776        | 0            | 0            | 0            | 0            | 0            | 0            | 0           | 0           | 0           | 0             | 0             | 0             |
| 777        | 0            | 0            | 0            | 0            | 0            | 0            | 0           | 0           | 0           | 0             | 0             | 0             |
| 778        | 0            | 0            | 0            | 0            | 0            | 0            | 0           | 0           | 0           | 11            | 0             | 0             |
| 779        | 0            | 2            | 0            | 0            | 0            | 9            | 0           | 0           | 0           | 0             | 0             | 0             |
| 780        | 0            | 0            | 0            | 0            | 0            | 0            | 0           | 0           | 0           | 0             | 0             | 0             |
| 781        | 0            | 0            | 0            | 0            | 0            | 0            | 0           | 0           | 0           | 0             | 0             | 0             |
| 782        | 1            | 1            | 3            | 0            | 0            | 2            | 0           | 0           | 0           | 0             | 0             | 0             |
| 783        | 0            | 0            | 0            | 0            | 0            | 0            | 0           | 0           | 0           | 0             | 0             | 0             |
| 784        | 0            | 0            | 0            | 0            | 0            | 0            | 0           | 0           | 0           | 0             | 11            | 0             |
| 785        | 0            | 0            | 0            | 0            | 0            | 0            | 0           | 0           | 0           | 0             | 11            | 0             |
| 786        | 0            | 0            | 0            | 0            | 0            | 0            | 0           | 0           | 0           | 11            | 0             | 0             |
| 787        | 0            | 0            | 0            | 0            | 0            | 0            | 0           | 0           | 0           | 11            | 0             | 0             |
| 788        | 0            | 0            | 0            | 0            | 0            | 0            | 0           | 0           | 0           | 0             | 0             | 0             |
| 789        | 0            | 0            | 0            | 0            | 0            | 0            | 0           | 0           | 0           | 0             | 0             | 0             |
| 790        | 0            | 0            | 0            | 0            | 0            | 0            | 0           | 0           | 11          | 0             | 0             | 0             |
| 791        | 1            | 2            | 0            | 0            | 0            | 0            | 0           | 0           | 0           | 0             | 0             | 0             |
| 792        | 0            | 0            | 0            | 0            | 0            | 0            | 0           | 0           | 0           | 0             | 0             | 0             |
| 793        | 0            | 0            | 0            | 0            | 0            | 0            | 0           | 0           | 0           | 0             | 0             | 0             |
| 794        | 0            | 0            | 0            | 0            | 0            | 0            | 0           | 11          | 0           | 0             | 0             | 0             |
| 795        | 0            | 0            | 0            | 0            | 0            | 0            | 0           | 0           | 0           | 0             | 0             | 0             |
| 796        | 0            | 0            | 0            | 0            | 0            | 0            | 0           | 11          | 0           | 0             | 0             | 0             |
| 797        | 0            | 0            | 0            | 0            | 0            | 0            | 0           | 0           | 11          | 0             | 0             | 0             |
| 798        | 0            | 0            | 0            | 0            | 0            | 0            | 0           | 0           | 11          | 0             | 0             | 0             |
| 799        | 0            | 0            | 0            | 0            | 0            | 0            | 0           | 0           | 11          | 0             | 0             | 0             |
| 800        | 2            | 0            | 0            | 0            | 0            | 0            | 3           | 0           | 0           | 0             | 0             | 0             |
| 801        | 0            | 0            | 0            | 0            | 0            | 0            | 0           | 0           | 0           | 0             | 11            | 0             |
| 802        | 0            | 0            | 0            | 0            | 0            | 0            | 0           | 0           | 11          | 0             | 0             | 0             |
| 803        | 0            | 0            | 0            | 0            | 0            | 0            | 0           | 11          | 0           | 0             | 0             | 0             |
| 804        | 0            | 0            | 0            | 0            | 0            | 0            | 0           | 0           | 0           | 0             | 0             | 0             |
| 805        | 0            | 0            | 0            | 0            | 0            | 0            | 0           | 0           | 0           | 11            | 0             | 0             |
| 806        | 0            | 0            | 0            | 0            | 0            | 0            | 0           | 11          | 0           | 0             | 0             | 0             |
| 807        | 0            | 0            | 0            | 0            | 0            | 0            | 0           | 0           | 0           | 0             | 0             | 0             |
| 808        | 0            | 0            | 0            | 0            | 0            | 0            | 0           | 0           | 11          | 0             | 0             | 0             |
| 809        | 0            | 0            | 0            | 0            | 0            | 0            | 0           | 0           | 0           | 0             | 0             | 0             |
| 810        | 0            | 0            | 0            | 0            | 0            | 0            | 0           | 0           | 0           | 11            | 0             | 0             |

| OTU Number | 7.11.15 Rep1 | 7.11.15 Rep2 | 7.11.15 Rep3 | 8.29.15 Rep1 | 8.29.15 Rep2 | 8.29.15 Rep3 | 2.6.16 Rep1 | 2.6.16 Rep2 | 2.6.16 Rep3 | 12.10.16 Rep1 | 12.10.16 Rep2 | 12.10.16 Rep3 |
|------------|--------------|--------------|--------------|--------------|--------------|--------------|-------------|-------------|-------------|---------------|---------------|---------------|
| 811        | 0            | 0            | 0            | 0            | 0            | 0            | 0           | 0           | 0           | 0             | 0             | 0             |
| 812        | 0            | 0            | 0            | 0            | 0            | 0            | 0           | 0           | 11          | 0             | 0             | 0             |
| 813        | 0            | 0            | 0            | 0            | 0            | 0            | 0           | 0           | 0           | 0             | 0             | 0             |
| 814        | 0            | 0            | 0            | 0            | 0            | 0            | 0           | 0           | 0           | 11            | 0             | 0             |
| 815        | 0            | 0            | 0            | 0            | 0            | 0            | 0           | 11          | 0           | 0             | 0             | 0             |
| 816        | 0            | 2            | 0            | 0            | 0            | 0            | 0           | 0           | 0           | 0             | 0             | 0             |
| 817        | 0            | 0            | 0            | 0            | 0            | 0            | 0           | 0           | 0           | 0             | 0             | 11            |
| 818        | 0            | 0            | 0            | 0            | 0            | 0            | 0           | 11          | 0           | 0             | 0             | 0             |
| 819        | 0            | 0            | 0            | 0            | 0            | 0            | 0           | 11          | 0           | 0             | 0             | 0             |
| 820        | 0            | 0            | 0            | 0            | 0            | 0            | 0           | 0           | 11          | 0             | 0             | 0             |
| 821        | 0            | 0            | 0            | 0            | 0            | 0            | 0           | 0           | 0           | 0             | 0             | 11            |
| 822        | 0            | 0            | 0            | 0            | 0            | 0            | 0           | 0           | 0           | 0             | 0             | 11            |
| 823        | 0            | 0            | 0            | 0            | 0            | 0            | 0           | 0           | 0           | 0             | 0             | 0             |
| 824        | 0            | 0            | 0            | 0            | 0            | 0            | 0           | 11          | 0           | 0             | 0             | 0             |
| 825        | 0            | 0            | 0            | 0            | 0            | 0            | 0           | 0           | 0           | 11            | 0             | 0             |
| 826        | 0            | 0            | 0            | 0            | 0            | 0            | 0           | 0           | 0           | 0             | 0             | 0             |
| 827        | 0            | 0            | 0            | 0            | 0            | 0            | 0           | 10          | 0           | 0             | 0             | 0             |
| 828        | 0            | 0            | 0            | 0            | 0            | 0            | 0           | 10          | 0           | 0             | 0             | 0             |
| 829        | 0            | 0            | 0            | 0            | 0            | 0            | 0           | 10          | 0           | 0             | 0             | 0             |
| 830        | 0            | 0            | 0            | 0            | 0            | 0            | 0           | 0           | 0           | 0             | 0             | 10            |
| 831        | 0            | 0            | 0            | 0            | 0            | 0            | 0           | 0           | 0           | 0             | 10            | 0             |
| 832        | 0            | 0            | 0            | 0            | 0            | 0            | 0           | 0           | 0           | 0             | 0             | 0             |
| 833        | 0            | 0            | 0            | 0            | 0            | 0            | 0           | 0           | 0           | 0             | 10            | 0             |
| 834        | 0            | 0            | 0            | 0            | 0            | 0            | 0           | 0           | 0           | 0             | 0             | 0             |
| 835        | 0            | 0            | 0            | 0            | 0            | 0            | 0           | 0           | 0           | 0             | 0             | 10            |
| 836        | 0            | 0            | 0            | 0            | 0            | 0            | 0           | 0           | 0           | 0             | 10            | 0             |
| 837        | 0            | 0            | 0            | 0            | 0            | 0            | 0           | 0           | 0           | 0             | 0             | 10            |
| 838        | 0            | 0            | 0            | 0            | 0            | 0            | 0           | 0           | 0           | 0             | 0             | 0             |
| 839        | 0            | 0            | 0            | 0            | 0            | 0            | 0           | 0           | 10          | 0             | 0             | 0             |
| 840        | 0            | 0            | 0            | 0            | 0            | 0            | 0           | 0           | 10          | 0             | 0             | 0             |
| 841        | 0            | 0            | 0            | 0            | 0            | 0            | 0           | 0           | 10          | 0             | 0             | 0             |
| 842        | 0            | 0            | 0            | 0            | 0            | 0            | 0           | 0           | 10          | 0             | 0             | 0             |
| 843        | 0            | 0            | 0            | 0            | 0            | 0            | 0           | 0           | 0           | 0             | 0             | 0             |
| 844        | 0            | 0            | 0            | 0            | 0            | 0            | 0           | 0           | 10          | 0             | 0             | 0             |
| 845        | 0            | 0            | 0            | 0            | 0            | 0            | 0           | 0           | 0           | 0             | 0             | 0             |
| 846        | 0            | 0            | 0            | 0            | 0            | 0            | 0           | 0           | 10          | 0             | 0             | 0             |
| 847        | 1            | 0            | 0            | 0            | 0            | 0            | 7           | 0           | 0           | 0             | 0             | 0             |
| 848        | 0            | 0            | 0            | 0            | 0            | 0            | 0           | 0           | 0           | 0             | 10            | 0             |
| 849        | 0            | 0            | 0            | 3            | 0            | 1            | 0           | 0           | 0           | 0             | 0             | 0             |
| 850        | 1            | 0            | 6            | 1            | 0            | 2            | 0           | 0           | 0           | 0             | 0             | 0             |
| 851        | 7            | 0            | 3            | 0            | 0            | 0            | 0           | 0           | 0           | 0             | 0             | 0             |
| 852        | 0            | 0            | 0            | 0            | 0            | 0            | 0           | 0           | 10          | 0             | 0             | 0             |
| 853        | 0            | 0            | 0            | 0            | 0            | 0            | 0           | 0           | 10          | 0             | 0             | 0             |
| 854        | 0            | 0            | 0            | 0            | 0            | 0            | 0           | 0           | 0           | 0             | 10            | 0             |
| 855        | 0            | 0            | 0            | 0            | 0            | 0            | 0           | 0           | 10          | 0             | 0             | 0             |

| OTU Number | 7.11.15 Rep1 | 7.11.15 Rep2 | 7.11.15 Rep3 | 8.29.15 Rep1 | 8.29.15 Rep2 | 8.29.15 Rep3 | 2.6.16 Rep1 | 2.6.16 Rep2 | 2.6.16 Rep3 | 12.10.16 Rep1 | 12.10.16 Rep2 | 12.10.16 Rep3 |
|------------|--------------|--------------|--------------|--------------|--------------|--------------|-------------|-------------|-------------|---------------|---------------|---------------|
| 856        | 0            | 0            | 0            | 0            | 0            | 0            | 0           | 0           | 10          | 0             | 0             | 0             |
| 857        | 0            | 0            | 0            | 0            | 0            | 0            | 0           | 0           | 10          | 0             | 0             | 0             |
| 858        | 0            | 0            | 0            | 0            | 0            | 0            | 0           | 0           | 0           | 0             | 0             | 0             |
| 859        | 0            | 0            | 0            | 0            | 0            | 0            | 0           | 0           | 0           | 0             | 0             | 0             |
| 860        | 0            | 0            | 0            | 0            | 0            | 0            | 0           | 0           | 0           | 0             | 10            | 0             |
| 861        | 0            | 0            | 0            | 0            | 0            | 0            | 0           | 0           | 0           | 0             | 10            | 0             |
| 862        | 0            | 0            | 0            | 0            | 0            | 0            | 0           | 0           | 10          | 0             | 0             | 0             |
| 863        | 0            | 0            | 0            | 0            | 0            | 0            | 0           | 0           | 10          | 0             | 0             | 0             |
| 864        | 0            | 0            | 0            | 0            | 0            | 0            | 0           | 0           | 10          | 0             | 0             | 0             |
| 865        | 0            | 0            | 0            | 0            | 0            | 0            | 0           | 0           | 0           | 0             | 0             | 10            |
| 866        | 0            | 0            | 0            | 0            | 0            | 0            | 0           | 0           | 10          | 0             | 0             | 0             |
| 867        | 0            | 0            | 0            | 0            | 0            | 0            | 0           | 0           | 10          | 0             | 0             | 0             |
| 868        | 0            | 0            | 0            | 0            | 0            | 0            | 0           | 0           | 10          | 0             | 0             | 0             |
| 869        | 0            | 0            | 0            | 0            | 0            | 0            | 0           | 0           | 0           | 0             | 10            | 0             |
| 870        | 0            | 0            | 0            | 0            | 0            | 0            | 0           | 0           | 10          | 0             | 0             | 0             |
| 871        | 0            | 0            | 0            | 0            | 0            | 0            | 0           | 0           | 0           | 0             | 0             | 0             |
| 872        | 0            | 0            | 0            | 0            | 0            | 0            | 0           | 0           | 10          | 0             | 0             | 0             |
| 873        | 0            | 0            | 0            | 0            | 0            | 0            | 0           | 0           | 0           | 0             | 0             | 0             |
| 874        | 0            | 0            | 0            | 0            | 0            | 0            | 0           | 0           | 10          | 0             | 0             | 0             |
| 875        | 0            | 0            | 0            | 0            | 0            | 0            | 0           | 0           | 10          | 0             | 0             | 0             |
| 876        | 0            | 0            | 0            | 0            | 0            | 0            | 0           | 0           | 0           | 0             | 0             | 0             |
| 877        | 1            | 0            | 0            | 0            | 0            | 0            | 0           | 0           | 0           | 0             | 0             | 0             |
| 878        | 0            | 0            | 0            | 0            | 0            | 0            | 0           | 0           | 0           | 10            | 0             | 0             |
| 879        | 2            | 0            | 0            | 0            | 0            | 0            | 0           | 0           | 0           | 0             | 0             | 0             |
| 880        | 0            | 0            | 0            | 0            | 0            | 0            | 0           | 10          | 0           | 0             | 0             | 0             |
| 881        | 0            | 0            | 0            | 0            | 0            | 0            | 0           | 0           | 0           | 10            | 0             | 0             |
| 882        | 0            | 0            | 0            | 0            | 0            | 0            | 0           | 0           | 0           | 10            | 0             | 0             |
| 883        | 0            | 0            | 0            | 0            | 0            | 0            | 0           | 10          | 0           | 0             | 0             | 0             |
| 884        | 0            | 0            | 0            | 0            | 0            | 0            | 0           | 0           | 0           | 0             | 0             | 0             |
| 885        | 0            | 0            | 0            | 0            | 0            | 0            | 0           | 10          | 0           | 0             | 0             | 0             |
| 886        | 0            | 0            | 0            | 0            | 0            | 0            | 0           | 0           | 0           | 10            | 0             | 0             |
| 887        | 0            | 0            | 0            | 0            | 0            | 0            | 0           | 0           | 0           | 10            | 0             | 0             |
| 888        | 0            | 0            | 0            | 0            | 0            | 0            | 0           | 0           | 0           | 0             | 0             | 10            |
| 889        | 0            | 0            | 0            | 0            | 0            | 0            | 0           | 0           | 0           | 10            | 0             | 0             |
| 890        | 0            | 0            | 0            | 0            | 0            | 0            | 0           | 0           | 0           | 10            | 0             | 0             |
| 891        | 0            | 0            | 0            | 0            | 0            | 0            | 0           | 10          | 0           | 0             | 0             | 0             |
| 892        | 0            | 0            | 0            | 0            | 0            | 0            | 0           | 0           | 0           | 10            | 0             | 0             |
| 893        | 0            | 0            | 0            | 0            | 0            | 0            | 0           | 0           | 0           | 0             | 10            | 0             |
| 894        | 0            | 0            | 0            | 0            | 0            | 0            | 0           | 0           | 0           | 10            | 0             | 0             |
| 895        | 0            | 0            | 0            | 0            | 0            | 1            | 0           | 0           | 0           | 0             | 0             | 0             |
| 896        | 0            | 0            | 0            | 0            | 0            | 0            | 0           | 0           | 0           | 10            | 0             | 0             |
| 897        | 0            | 0            | 0            | 0            | 0            | 0            | 0           | 0           | 0           | 10            | 0             | 0             |
| 898        | 0            | 0            | 0            | 0            | 0            | 0            | 0           | 0           | 0           | 0             | 0             | 0             |
| 899        | 0            | 0            | 0            | 0            | 0            | 0            | 0           | 0           | 0           | 10            | 0             | 0             |
| 900        | 0            | 0            | 0            | 0            | 0            | 0            | 0           | 10          | 0           | 0             | 0             | 0             |

| OTU Number | 7.11.15 Rep1 | 7.11.15 Rep2 | 7.11.15 Rep3 | 8.29.15 Rep1 | 8.29.15 Rep2 | 8.29.15 Rep3 | 2.6.16 Rep1 | 2.6.16 Rep2 | 2.6.16 Rep3 | 12.10.16 Rep1 | 12.10.16 Rep2 | 12.10.16 Rep3 |
|------------|--------------|--------------|--------------|--------------|--------------|--------------|-------------|-------------|-------------|---------------|---------------|---------------|
| 901        | 0            | 0            | 0            | 0            | 0            | 0            | 0           | 10          | 0           | 0             | 0             | 0             |
| 902        | 1            | 0            | 0            | 0            | 2            | 1            | 0           | 0           | 0           | 0             | 0             | 0             |
| 903        | 0            | 0            | 0            | 0            | 0            | 0            | 0           | 0           | 0           | 10            | 0             | 0             |
| 904        | 1            | 0            | 0            | 2            | 1            | 4            | 0           | 0           | 0           | 0             | 0             | 0             |
| 905        | 0            | 0            | 0            | 0            | 0            | 0            | 0           | 0           | 10          | 0             | 0             | 0             |
| 906        | 1            | 1            | 0            | 2            | 1            | 1            | 0           | 0           | 0           | 0             | 0             | 0             |
| 907        | 0            | 0            | 0            | 0            | 0            | 0            | 0           | 10          | 0           | 0             | 0             | 0             |
| 908        | 0            | 0            | 0            | 0            | 0            | 0            | 0           | 10          | 0           | 0             | 0             | 0             |
| 909        | 0            | 0            | 0            | 0            | 0            | 0            | 0           | 0           | 0           | 0             | 10            | 0             |
| 910        | 0            | 0            | 0            | 0            | 0            | 0            | 0           | 0           | 0           | 10            | 0             | 0             |
| 911        | 0            | 0            | 0            | 0            | 0            | 0            | 0           | 0           | 0           | 10            | 0             | 0             |
| 912        | 0            | 0            | 0            | 0            | 0            | 0            | 0           | 10          | 0           | 0             | 0             | 0             |
| 913        | 0            | 0            | 0            | 0            | 0            | 0            | 0           | 0           | 0           | 10            | 0             | 0             |
| 914        | 0            | 1            | 0            | 0            | 0            | 0            | 0           | 0           | 0           | 0             | 0             | 0             |
| 915        | 0            | 0            | 0            | 0            | 0            | 0            | 0           | 0           | 0           | 10            | 0             | 0             |
| 916        | 0            | 0            | 0            | 0            | 0            | 0            | 0           | 10          | 0           | 0             | 0             | 0             |
| 917        | 0            | 0            | 0            | 0            | 0            | 0            | 0           | 0           | 0           | 10            | 0             | 0             |
| 918        | 0            | 0            | 0            | 0            | 0            | 0            | 0           | 10          | 0           | 0             | 0             | 0             |
| 919        | 0            | 0            | 0            | 0            | 0            | 0            | 0           | 10          | 0           | 0             | 0             | 0             |
| 920        | 0            | 0            | 0            | 0            | 7            | 0            | 0           | 0           | 0           | 0             | 0             | 0             |
| 921        | 0            | 0            | 0            | 0            | 0            | 0            | 0           | 0           | 0           | 10            | 0             | 0             |
| 922        | 0            | 0            | 0            | 0            | 0            | 0            | 0           | 0           | 0           | 10            | 0             | 0             |
| 923        | 0            | 4            | 0            | 0            | 0            | 0            | 0           | 0           | 0           | 0             | 0             | 0             |
| 924        | 0            | 0            | 0            | 0            | 0            | 0            | 0           | 0           | 0           | 0             | 0             | 0             |
| 925        | 0            | 0            | 0            | 0            | 0            | 0            | 0           | 10          | 0           | 0             | 0             | 0             |
| 926        | 0            | 0            | 0            | 0            | 0            | 0            | 0           | 0           | 9           | 0             | 0             | 0             |
| 927        | 0            | 0            | 0            | 0            | 0            | 0            | 0           | 0           | 0           | 9             | 0             | 0             |
| 928        | 0            | 0            | 0            | 0            | 0            | 0            | 0           | 0           | 0           | 0             | 0             | 9             |
| 929        | 0            | 0            | 0            | 0            | 0            | 0            | 0           | 0           | 0           | 9             | 0             | 0             |
| 930        | 0            | 0            | 0            | 0            | 0            | 0            | 0           | 9           | 0           | 0             | 0             | 0             |
| 931        | 0            | 0            | 0            | 0            | 0            | 0            | 0           | 0           | 9           | 0             | 0             | 0             |
| 932        | 0            | 0            | 0            | 0            | 0            | 0            | 0           | 0           | 0           | 0             | 0             | 0             |
| 933        | 0            | 0            | 0            | 0            | 0            | 0            | 0           | 0           | 9           | 0             | 0             | 0             |
| 934        | 0            | 8            | 0            | 0            | 0            | 0            | 0           | 0           | 0           | 0             | 0             | 0             |
| 935        | 0            | 0            | 0            | 0            | 0            | 0            | 0           | 0           | 0           | 9             | 0             | 0             |
| 936        | 0            | 0            | 0            | 0            | 0            | 0            | 0           | 0           | 0           | 0             | 0             | 0             |
| 937        | 0            | 0            | 0            | 0            | 0            | 0            | 0           | 0           | 0           | 9             | 0             | 0             |
| 938        | 0            | 0            | 0            | 0            | 0            | 0            | 0           | 0           | 0           | 9             | 0             | 0             |
| 939        | 0            | 0            | 0            | 0            | 0            | 0            | 0           | 0           | 9           | 0             | 0             | 0             |
| 940        | 0            | 0            | 0            | 0            | 0            | 0            | 0           | 0           | 9           | 0             | 0             | 0             |
| 941        | 0            | 0            | 0            | 0            | 0            | 0            | 0           | 0           | 9           | 0             | 0             | 0             |
| 942        | 0            | 0            | 0            | 0            | 0            | 0            | 0           | 0           | 0           | 0             | 0             | 0             |
| 943        | 0            | 0            | 0            | 0            | 0            | 0            | 0           | 0           | 9           | 0             | 0             | 0             |
| 944        | 0            | 0            | 0            | 0            | 0            | 0            | 0           | 0           | 9           | 0             | 0             | 0             |
| 945        | 0            | 0            | 0            | 0            | 0            | 0            | 0           | 9           | 0           | 0             | 0             | 0             |



| OTU Number | 7.11.15 Rep1 | 7.11.15 Rep2 | 7.11.15 Rep3 | 8.29.15 Rep1 | 8.29.15 Rep2 | 8.29.15 Rep3 | 2.6.16 Rep1 | 2.6.16 Rep2 | 2.6.16 Rep3 | 12.10.16 Rep1 | 12.10.16 Rep2 | 12.10.16 Rep3 |
|------------|--------------|--------------|--------------|--------------|--------------|--------------|-------------|-------------|-------------|---------------|---------------|---------------|
| 991        | 0            | 0            | 0            | 0            | 0            | 0            | 0           | 0           | 9           | 0             | 0             | 0             |
| 992        | 0            | 0            | 0            | 0            | 0            | 0            | 0           | 0           | 9           | 0             | 0             | 0             |
| 993        | 1            | 0            | 0            | 0            | 0            | 0            | 0           | 0           | 0           | 0             | 0             | 0             |
| 994        | 0            | 0            | 0            | 0            | 0            | 0            | 0           | 9           | 0           | 0             | 0             | 0             |
| 995        | 0            | 0            | 0            | 0            | 0            | 0            | 0           | 0           | 9           | 0             | 0             | 0             |
| 996        | 0            | 0            | 0            | 0            | 0            | 0            | 0           | 0           | 0           | 0             | 0             | 0             |
| 997        | 0            | 0            | 0            | 0            | 0            | 0            | 0           | 0           | 9           | 0             | 0             | 0             |
| 998        | 0            | 0            | 0            | 0            | 0            | 0            | 0           | 0           | 0           | 9             | 0             | 0             |
| 999        | 0            | 0            | 0            | 0            | 0            | 0            | 0           | 9           | 0           | 0             | 0             | 0             |
| 1000       | 0            | 0            | 0            | 0            | 0            | 0            | 0           | 0           | 0           | 0             | 0             | 9             |
| 1001       | 0            | 0            | 0            | 0            | 0            | 0            | 0           | 0           | 0           | 0             | 0             | 0             |
| 1002       | 0            | 0            | 0            | 0            | 0            | 0            | 0           | 0           | 0           | 0             | 0             | 0             |
| 1003       | 0            | 0            | 0            | 0            | 0            | 0            | 0           | 0           | 0           | 0             | 0             | 0             |
| 1004       | 0            | 0            | 0            | 0            | 0            | 0            | 0           | 0           | 0           | 9             | 0             | 0             |
| 1005       | 0            | 0            | 0            | 0            | 0            | 0            | 0           | 0           | 0           | 0             | 0             | 0             |
| 1006       | 0            | 0            | 0            | 0            | 0            | 0            | 0           | 0           | 0           | 0             | 0             | 0             |
| 1007       | 0            | 0            | 0            | 0            | 0            | 0            | 0           | 0           | 0           | 0             | 0             | 9             |
| 1008       | 0            | 0            | 0            | 0            | 0            | 0            | 0           | 9           | 0           | 0             | 0             | 0             |
| 1009       | 0            | 0            | 0            | 0            | 0            | 0            | 0           | 0           | 0           | 0             | 0             | 0             |
| 1010       | 0            | 0            | 0            | 0            | 0            | 0            | 0           | 0           | 0           | 0             | 9             | 0             |
| 1011       | 0            | 0            | 0            | 0            | 0            | 0            | 0           | 0           | 0           | 0             | 9             | 0             |
| 1012       | 0            | 0            | 0            | 0            | 0            | 0            | 0           | 0           | 0           | 0             | 9             | 0             |
| 1013       | 0            | 0            | 0            | 0            | 0            | 7            | 0           | 0           | 0           | 0             | 0             | 0             |
| 1014       | 0            | 0            | 0            | 0            | 0            | 0            | 0           | 9           | 0           | 0             | 0             | 0             |
| 1015       | 0            | 0            | 0            | 0            | 0            | 0            | 0           | 9           | 0           | 0             | 0             | 0             |
| 1016       | 0            | 0            | 0            | 0            | 0            | 0            | 0           | 0           | 0           | 0             | 9             | 0             |
| 1017       | 0            | 0            | 0            | 0            | 0            | 0            | 0           | 9           | 0           | 0             | 0             | 0             |
| 1018       | 0            | 0            | 0            | 0            | 2            | 0            | 0           | 0           | 0           | 0             | 0             | 0             |
| 1019       | 0            | 0            | 0            | 0            | 0            | 0            | 0           | 0           | 0           | 9             | 0             | 0             |
| 1020       | 0            | 0            | 0            | 0            | 0            | 0            | 0           | 0           | 0           | 0             | 0             | 0             |
| 1021       | 0            | 0            | 0            | 0            | 0            | 0            | 0           | 0           | 0           | 0             | 0             | 0             |
| 1022       | 0            | 0            | 0            | 0            | 0            | 0            | 0           | 0           | 0           | 9             | 0             | 0             |
| 1023       | 0            | 0            | 0            | 0            | 0            | 0            | 0           | 0           | 0           | 0             | 0             | 9             |
| 1024       | 0            | 0            | 0            | 0            | 0            | 0            | 0           | 9           | 0           | 0             | 0             | 0             |
| 1025       | 0            | 0            | 0            | 0            | 0            | 0            | 0           | 0           | 0           | 0             | 0             | 0             |
| 1026       | 0            | 0            | 0            | 0            | 0            | 0            | 0           | 0           | 0           | 0             | 0             | 9             |
| 1027       | 0            | 0            | 0            | 0            | 0            | 0            | 0           | 0           | 0           | 0             | 0             | 0             |
| 1028       | 0            | 0            | 0            | 0            | 0            | 0            | 0           | 0           | 0           | 0             | 9             | 0             |
| 1029       | 0            | 0            | 0            | 0            | 0            | 0            | 0           | 9           | 0           | 0             | 0             | 0             |
| 1030       | 0            | 0            | 0            | 0            | 0            | 0            | 0           | 9           | 0           | 0             | 0             | 0             |
| 1031       | 0            | 0            | 0            | 0            | 0            | 0            | 0           | 0           | 0           | 9             | 0             | 0             |
| 1032       | 0            | 0            | 0            | 0            | 0            | 0            | 0           | 0           | 0           | 0             | 0             | 0             |
| 1033       | 0            | 0            | 0            | 0            | 0            | 0            | 0           | 0           | 0           | 0             | 0             | 0             |
| 1034       | 0            | 0            | 0            | 0            | 0            | 0            | 0           | 0           | 0           | 0             | 9             | 0             |
| 1035       | 0            | 0            | 0            | 0            | 0            | 0            | 0           | 0           | 0           | 9             | 0             | 0             |

| OTU Number | 7.11.15 Rep1 | 7.11.15 Rep2 | 7.11.15 Rep3 | 8.29.15 Rep1 | 8.29.15 Rep2 | 8.29.15 Rep3 | 2.6.16 Rep1 | 2.6.16 Rep2 | 2.6.16 Rep3 | 12.10.16 Rep1 | 12.10.16 Rep2 | 12.10.16 Rep3 |
|------------|--------------|--------------|--------------|--------------|--------------|--------------|-------------|-------------|-------------|---------------|---------------|---------------|
| 1036       | 0            | 0            | 0            | 0            | 0            | 0            | 0           | 0           | 0           | 0             | 0             | 0             |
| 1037       | 0            | 0            | 0            | 0            | 0            | 0            | 0           | 0           | 9           | 0             | 0             | 0             |
| 1038       | 0            | 0            | 0            | 0            | 0            | 0            | 0           | 9           | 0           | 0             | 0             | 0             |
| 1039       | 0            | 0            | 0            | 0            | 0            | 0            | 0           | 0           | 0           | 0             | 0             | 9             |
| 1040       | 0            | 0            | 0            | 0            | 0            | 0            | 0           | 0           | 9           | 0             | 0             | 0             |
| 1041       | 0            | 0            | 0            | 0            | 0            | 0            | 0           | 9           | 0           | 0             | 0             | 0             |
| 1042       | 6            | 0            | 0            | 0            | 0            | 0            | 0           | 0           | 0           | 0             | 0             | 0             |
| 1043       | 0            | 0            | 0            | 0            | 0            | 0            | 0           | 0           | 0           | 0             | 9             | 0             |
| 1044       | 0            | 0            | 0            | 0            | 0            | 0            | 0           | 0           | 0           | 0             | 0             | 0             |
| 1045       | 0            | 0            | 0            | 0            | 0            | 0            | 0           | 0           | 0           | 0             | 9             | 0             |
| 1046       | 0            | 0            | 0            | 0            | 0            | 0            | 0           | 0           | 0           | 0             | 9             | 0             |
| 1047       | 0            | 0            | 0            | 0            | 0            | 0            | 0           | 0           | 0           | 0             | 0             | 9             |
| 1048       | 0            | 0            | 0            | 0            | 0            | 0            | 0           | 0           | 9           | 0             | 0             | 0             |
| 1049       | 0            | 0            | 0            | 0            | 0            | 0            | 0           | 0           | 9           | 0             | 0             | 0             |
| 1050       | 0            | 0            | 0            | 0            | 0            | 0            | 0           | 0           | 0           | 9             | 0             | 0             |
| 1051       | 0            | 0            | 0            | 0            | 0            | 0            | 0           | 0           | 9           | 0             | 0             | 0             |
| 1052       | 0            | 0            | 0            | 0            | 0            | 0            | 0           | 0           | 0           | 0             | 9             | 0             |
| 1053       | 0            | 0            | 0            | 0            | 0            | 0            | 0           | 0           | 0           | 0             | 9             | 0             |
| 1054       | 0            | 0            | 0            | 0            | 0            | 0            | 0           | 0           | 9           | 0             | 0             | 0             |
| 1055       | 0            | 0            | 0            | 0            | 0            | 0            | 0           | 0           | 0           | 9             | 0             | 0             |
| 1056       | 0            | 0            | 0            | 0            | 0            | 0            | 0           | 0           | 0           | 0             | 0             | 0             |
| 1057       | 0            | 0            | 0            | 0            | 0            | 0            | 0           | 0           | 0           | 0             | 0             | 0             |
| 1058       | 0            | 0            | 0            | 0            | 0            | 0            | 0           | 0           | 0           | 0             | 9             | 0             |
| 1059       | 0            | 0            | 0            | 0            | 0            | 0            | 0           | 0           | 0           | 9             | 0             | 0             |
| 1060       | 0            | 0            | 0            | 0            | 0            | 0            | 0           | 0           | 0           | 9             | 0             | 0             |
| 1061       | 0            | 0            | 0            | 0            | 0            | 0            | 0           | 9           | 0           | 0             | 0             | 0             |
| 1062       | 0            | 0            | 0            | 0            | 0            | 0            | 0           | 0           | 0           | 0             | 0             | 0             |
| 1063       | 6            | 0            | 0            | 0            | 0            | 0            | 0           | 0           | 0           | 0             | 0             | 0             |
| 1064       | 0            | 0            | 0            | 0            | 0            | 0            | 0           | 0           | 0           | 8             | 0             | 0             |
| 1065       | 0            | 0            | 0            | 0            | 0            | 0            | 0           | 0           | 0           | 0             | 0             | 0             |
| 1066       | 0            | 0            | 0            | 0            | 0            | 0            | 0           | 8           | 0           | 0             | 0             | 0             |
| 1067       | 0            | 0            | 0            | 0            | 0            | 0            | 0           | 0           | 0           | 0             | 0             | 8             |
| 1068       | 0            | 0            | 0            | 0            | 0            | 0            | 0           | 0           | 0           | 0             | 0             | 8             |
| 1069       | 0            | 0            | 0            | 0            | 0            | 0            | 0           | 0           | 0           | 0             | 0             | 0             |
| 1070       | 0            | 0            | 0            | 0            | 0            | 0            | 0           | 0           | 0           | 0             | 0             | 0             |
| 1071       | 0            | 0            | 0            | 0            | 0            | 0            | 0           | 8           | 0           | 0             | 0             | 0             |
| 1072       | 0            | 0            | 0            | 2            | 6            | 0            | 0           | 0           | 0           | 0             | 0             | 0             |
| 1073       | 0            | 0            | 0            | 0            | 4            | 1            | 0           | 0           | 0           | 0             | 0             | 0             |
| 1074       | 0            | 0            | 0            | 0            | 0            | 0            | 0           | 0           | 8           | 0             | 0             | 0             |
| 1075       | 0            | 0            | 0            | 0            | 0            | 0            | 0           | 0           | 0           | 8             | 0             | 0             |
| 1076       | 0            | 0            | 0            | 0            | 0            | 0            | 8           | 0           | 0           | 0             | 0             | 0             |
| 1077       | 0            | 0            | 0            | 0            | 0            | 0            | 0           | 0           | 8           | 0             | 0             | 0             |
| 1078       | 0            | 0            | 0            | 0            | 0            | 0            | 0           | 0           | 0           | 0             | 0             | 0             |
| 1079       | 0            | 0            | 0            | 0            | 0            | 0            | 0           | 0           | 8           | 0             | 0             | 0             |
| 1080       | 0            | 0            | 0            | 0            | 0            | 0            | 0           | 8           | 0           | 0             | 0             | 0             |







| OTU Number | 7.11.15 Rep1 | 7.11.15 Rep2 | 7.11.15 Rep3 | 8.29.15 Rep1 | 8.29.15 Rep2 | 8.29.15 Rep3 | 2.6.16 Rep1 | 2.6.16 Rep2 | 2.6.16 Rep3 | 12.10.16 Rep1 | 12.10.16 Rep2 | 12.10.16 Rep3 |
|------------|--------------|--------------|--------------|--------------|--------------|--------------|-------------|-------------|-------------|---------------|---------------|---------------|
| 1171       | 0            | 0            | 0            | 0            | 0            | 0            | 0           | 0           | 0           | 0             | 0             | 8             |
| 1172       | 0            | 0            | 0            | 0            | 0            | 0            | 0           | 0           | 8           | 0             | 0             | 0             |
| 1173       | 0            | 0            | 0            | 0            | 0            | 0            | 0           | 0           | 0           | 0             | 8             | 0             |
| 1174       | 0            | 0            | 0            | 0            | 0            | 0            | 0           | 0           | 0           | 8             | 0             | 0             |
| 1175       | 0            | 0            | 0            | 0            | 0            | 0            | 0           | 0           | 0           | 0             | 0             | 0             |
| 1176       | 4            | 0            | 0            | 0            | 2            | 0            | 0           | 0           | 0           | 0             | 0             | 0             |
| 1177       | 1            | 5            | 0            | 0            | 0            | 0            | 0           | 0           | 0           | 0             | 0             | 0             |
| 1178       | 0            | 0            | 0            | 0            | 0            | 0            | 0           | 0           | 0           | 0             | 0             | 0             |
| 1179       | 0            | 0            | 0            | 0            | 2            | 6            | 0           | 0           | 0           | 0             | 0             | 0             |
| 1180       | 0            | 1            | 0            | 0            | 0            | 0            | 0           | 0           | 0           | 0             | 0             | 0             |
| 1181       | 0            | 0            | 0            | 0            | 0            | 0            | 0           | 0           | 0           | 0             | 0             | 0             |
| 1182       | 0            | 0            | 0            | 0            | 1            | 0            | 1           | 0           | 0           | 0             | 0             | 0             |
| 1183       | 0            | 0            | 2            | 4            | 1            | 1            | 0           | 0           | 0           | 0             | 0             | 0             |
| 1184       | 0            | 0            | 0            | 0            | 0            | 0            | 0           | 0           | 0           | 0             | 0             | 0             |
| 1185       | 2            | 0            | 1            | 0            | 0            | 0            | 0           | 0           | 0           | 0             | 0             | 0             |
| 1186       | 0            | 0            | 0            | 0            | 0            | 0            | 0           | 0           | 0           | 0             | 8             | 0             |
| 1187       | 0            | 0            | 0            | 0            | 0            | 0            | 0           | 0           | 8           | 0             | 0             | 0             |
| 1188       | 0            | 0            | 0            | 0            | 0            | 0            | 0           | 0           | 0           | 0             | 0             | 8             |
| 1189       | 0            | 0            | 0            | 0            | 0            | 0            | 0           | 0           | 0           | 8             | 0             | 0             |
| 1190       | 0            | 0            | 0            | 0            | 0            | 0            | 0           | 0           | 0           | 0             | 0             | 8             |
| 1191       | 0            | 0            | 0            | 0            | 0            | 0            | 0           | 0           | 0           | 0             | 0             | 8             |
| 1192       | 0            | 0            | 0            | 0            | 0            | 0            | 0           | 0           | 0           | 8             | 0             | 0             |
| 1193       | 0            | 0            | 0            | 0            | 0            | 0            | 0           | 0           | 0           | 0             | 8             | 0             |
| 1194       | 0            | 0            | 0            | 0            | 0            | 0            | 0           | 8           | 0           | 0             | 0             | 0             |
| 1195       | 0            | 0            | 0            | 0            | 0            | 0            | 0           | 0           | 0           | 8             | 0             | 0             |
| 1196       | 0            | 0            | 0            | 0            | 0            | 0            | 0           | 0           | 0           | 0             | 8             | 0             |
| 1197       | 0            | 0            | 0            | 0            | 0            | 0            | 0           | 8           | 0           | 0             | 0             | 0             |
| 1198       | 0            | 0            | 0            | 0            | 0            | 0            | 0           | 0           | 0           | 0             | 0             | 8             |
| 1199       | 0            | 0            | 0            | 0            | 0            | 0            | 0           | 0           | 0           | 0             | 0             | 8             |
| 1200       | 0            | 0            | 0            | 0            | 0            | 0            | 0           | 0           | 0           | 0             | 0             | 0             |
| 1201       | 0            | 0            | 0            | 0            | 0            | 0            | 0           | 0           | 0           | 0             | 0             | 8             |
| 1202       | 0            | 0            | 0            | 0            | 0            | 0            | 0           | 8           | 0           | 0             | 0             | 0             |
| 1203       | 0            | 0            | 0            | 0            | 0            | 0            | 0           | 0           | 0           | 0             | 0             | 0             |
| 1204       | 0            | 0            | 0            | 0            | 0            | 0            | 0           | 0           | 8           | 0             | 0             | 0             |
| 1205       | 0            | 0            | 0            | 0            | 0            | 0            | 0           | 0           | 0           | 0             | 0             | 8             |
| 1206       | 0            | 0            | 0            | 0            | 0            | 0            | 0           | 0           | 0           | 0             | 0             | 0             |
| 1207       | 0            | 0            | 0            | 0            | 0            | 0            | 0           | 0           | 0           | 0             | 0             | 0             |
| 1208       | 0            | 0            | 0            | 0            | 0            | 0            | 0           | 0           | 0           | 0             | 0             | 0             |
| 1209       | 0            | 0            | 0            | 0            | 0            | 0            | 0           | 0           | 0           | 0             | 0             | 8             |
| 1210       | 0            | 0            | 0            | 0            | 0            | 0            | 0           | 0           | 0           | 0             | 0             | 8             |
| 1211       | 0            | 0            | 0            | 0            | 0            | 0            | 0           | 0           | 8           | 0             | 0             | 0             |
| 1212       | 0            | 0            | 0            | 0            | 0            | 0            | 0           | 0           | 0           | 0             | 8             | 0             |
| 1213       | 0            | 0            | 0            | 0            | 0            | 0            | 0           | 0           | 0           | 0             | 0             | 8             |
| 1214       | 0            | 0            | 0            | 0            | 0            | 0            | 0           | 0           | 0           | 0             | 0             | 0             |
| 1215       | 0            | 0            | 0            | 0            | 0            | 0            | 0           | 8           | 0           | 0             | 0             | 0             |

| OTU Number | 7.11.15 Rep1 | 7.11.15 Rep2 | 7.11.15 Rep3 | 8.29.15 Rep1 | 8.29.15 Rep2 | 8.29.15 Rep3 | 2.6.16 Rep1 | 2.6.16 Rep2 | 2.6.16 Rep3 | 12.10.16 Rep1 | 12.10.16 Rep2 | 12.10.16 Rep3 |
|------------|--------------|--------------|--------------|--------------|--------------|--------------|-------------|-------------|-------------|---------------|---------------|---------------|
| 1216       | 0            | 0            | 0            | 0            | 0            | 0            | 0           | 0           | 0           | 0             | 0             | 0             |
| 1217       | 0            | 0            | 0            | 0            | 0            | 0            | 0           | 0           | 0           | 0             | 8             | 0             |
| 1218       | 0            | 0            | 0            | 0            | 0            | 0            | 0           | 0           | 7           | 0             | 0             | 0             |
| 1219       | 0            | 0            | 0            | 0            | 0            | 0            | 0           | 0           | 0           | 7             | 0             | 0             |
| 1220       | 0            | 0            | 0            | 0            | 0            | 0            | 0           | 0           | 0           | 0             | 7             | 0             |
| 1221       | 0            | 0            | 0            | 0            | 0            | 0            | 0           | 0           | 7           | 0             | 0             | 0             |
| 1222       | 0            | 0            | 0            | 0            | 0            | 0            | 0           | 0           | 0           | 7             | 0             | 0             |
| 1223       | 0            | 0            | 0            | 0            | 0            | 0            | 0           | 0           | 0           | 0             | 0             | 7             |
| 1224       | 0            | 0            | 0            | 0            | 0            | 0            | 0           | 7           | 0           | 0             | 0             | 0             |
| 1225       | 0            | 0            | 0            | 0            | 0            | 0            | 0           | 0           | 0           | 7             | 0             | 0             |
| 1226       | 0            | 0            | 0            | 0            | 0            | 0            | 0           | 0           | 0           | 0             | 0             | 7             |
| 1227       | 0            | 0            | 0            | 0            | 0            | 0            | 0           | 0           | 7           | 0             | 0             | 0             |
| 1228       | 0            | 0            | 0            | 0            | 0            | 0            | 0           | 0           | 0           | 0             | 0             | 0             |
| 1229       | 0            | 0            | 0            | 0            | 0            | 0            | 2           | 0           | 0           | 0             | 0             | 0             |
| 1230       | 0            | 0            | 0            | 0            | 0            | 0            | 0           | 0           | 0           | 0             | 0             | 0             |
| 1231       | 0            | 1            | 0            | 0            | 0            | 0            | 0           | 0           | 0           | 0             | 0             | 0             |
| 1232       | 0            | 0            | 0            | 0            | 0            | 0            | 0           | 0           | 0           | 0             | 0             | 0             |
| 1233       | 0            | 0            | 0            | 0            | 0            | 0            | 0           | 7           | 0           | 0             | 0             | 0             |
| 1234       | 0            | 0            | 0            | 0            | 0            | 0            | 0           | 0           | 7           | 0             | 0             | 0             |
| 1235       | 0            | 0            | 0            | 0            | 0            | 0            | 0           | 0           | 0           | 0             | 0             | 0             |
| 1236       | 0            | 0            | 0            | 0            | 0            | 0            | 0           | 0           | 0           | 0             | 7             | 0             |
| 1237       | 0            | 0            | 0            | 0            | 0            | 0            | 0           | 0           | 0           | 0             | 0             | 0             |
| 1238       | 0            | 0            | 0            | 0            | 0            | 0            | 0           | 7           | 0           | 0             | 0             | 0             |
| 1239       | 0            | 0            | 0            | 0            | 0            | 0            | 0           | 0           | 0           | 0             | 7             | 0             |
| 1240       | 0            | 0            | 0            | 0            | 0            | 0            | 0           | 0           | 7           | 0             | 0             | 0             |
| 1241       | 0            | 0            | 0            | 0            | 0            | 0            | 0           | 0           | 0           | 7             | 0             | 0             |
| 1242       | 0            | 0            | 0            | 0            | 0            | 0            | 0           | 0           | 0           | 0             | 0             | 0             |
| 1243       | 0            | 0            | 0            | 0            | 0            | 0            | 0           | 7           | 0           | 0             | 0             | 0             |
| 1244       | 0            | 0            | 0            | 0            | 0            | 0            | 0           | 0           | 0           | 0             | 7             | 0             |
| 1245       | 0            | 0            | 0            | 0            | 0            | 0            | 0           | 0           | 0           | 7             | 0             | 0             |
| 1246       | 0            | 0            | 0            | 0            | 0            | 0            | 0           | 0           | 0           | 0             | 0             | 0             |
| 1247       | 0            | 0            | 0            | 0            | 0            | 0            | 0           | 0           | 0           | 0             | 7             | 0             |
| 1248       | 0            | 0            | 0            | 0            | 0            | 0            | 0           | 0           | 0           | 0             | 7             | 0             |
| 1249       | 0            | 0            | 0            | 0            | 0            | 0            | 0           | 0           | 0           | 7             | 0             | 0             |
| 1250       | 0            | 0            | 0            | 0            | 0            | 0            | 0           | 0           | 0           | 7             | 0             | 0             |
| 1251       | 0            | 0            | 0            | 0            | 0            | 0            | 0           | 0           | 0           | 0             | 0             | 0             |
| 1252       | 0            | 0            | 0            | 0            | 0            | 0            | 0           | 0           | 7           | 0             | 0             | 0             |
| 1253       | 0            | 0            | 0            | 0            | 0            | 0            | 0           | 0           | 0           | 7             | 0             | 0             |
| 1254       | 0            | 0            | 0            | 0            | 0            | 0            | 0           | 0           | 0           | 0             | 0             | 0             |
| 1255       | 0            | 0            | 0            | 0            | 0            | 0            | 0           | 0           | 0           | 0             | 7             | 0             |
| 1256       | 0            | 0            | 0            | 0            | 0            | 0            | 0           | 0           | 0           | 0             | 0             | 0             |
| 1257       | 0            | 0            | 0            | 0            | 0            | 0            | 0           | 0           | 0           | 7             | 0             | 0             |
| 1258       | 0            | 3            | 0            | 0            | 0            | 0            | 0           | 0           | 0           | 0             | 0             | 0             |
| 1259       | 0            | 0            | 0            | 0            | 0            | 0            | 0           | 7           | 0           | 0             | 0             | 0             |
| 1260       | 0            | 0            | 0            | 0            | 0            | 0            | 0           | 0           | 7           | 0             | 0             | 0             |

| OTU Number | 7.11.15 Rep1 | 7.11.15 Rep2 | 7.11.15 Rep3 | 8.29.15 Rep1 | 8.29.15 Rep2 | 8.29.15 Rep3 | 2.6.16 Rep1 | 2.6.16 Rep2 | 2.6.16 Rep3 | 12.10.16 Rep1 | 12.10.16 Rep2 | 12.10.16 Rep3 |
|------------|--------------|--------------|--------------|--------------|--------------|--------------|-------------|-------------|-------------|---------------|---------------|---------------|
| 1261       | 0            | 0            | 0            | 0            | 0            | 0            | 0           | 0           | 7           | 0             | 0             | 0             |
| 1262       | 1            | 5            | 1            | 0            | 0            | 0            | 0           | 0           | 0           | 0             | 0             | 0             |
| 1263       | 0            | 0            | 0            | 0            | 0            | 0            | 0           | 0           | 7           | 0             | 0             | 0             |
| 1264       | 0            | 0            | 0            | 0            | 0            | 0            | 0           | 0           | 0           | 7             | 0             | 0             |
| 1265       | 0            | 0            | 0            | 0            | 0            | 0            | 0           | 7           | 0           | 0             | 0             | 0             |
| 1266       | 0            | 0            | 0            | 0            | 0            | 0            | 0           | 0           | 0           | 0             | 0             | 7             |
| 1267       | 0            | 0            | 0            | 0            | 0            | 0            | 0           | 0           | 0           | 7             | 0             | 0             |
| 1268       | 0            | 0            | 0            | 0            | 0            | 0            | 0           | 0           | 0           | 0             | 0             | 7             |
| 1269       | 0            | 0            | 0            | 0            | 0            | 0            | 7           | 0           | 0           | 0             | 0             | 0             |
| 1270       | 0            | 0            | 0            | 0            | 0            | 0            | 0           | 0           | 0           | 0             | 7             | 0             |
| 1271       | 0            | 0            | 0            | 0            | 0            | 0            | 0           | 0           | 0           | 7             | 0             | 0             |
| 1272       | 0            | 0            | 0            | 0            | 0            | 0            | 0           | 0           | 0           | 0             | 7             | 0             |
| 1273       | 0            | 0            | 0            | 0            | 0            | 0            | 0           | 0           | 0           | 0             | 0             | 0             |
| 1274       | 0            | 0            | 0            | 0            | 0            | 0            | 0           | 0           | 0           | 0             | 0             | 7             |
| 1275       | 0            | 0            | 0            | 0            | 0            | 0            | 0           | 0           | 0           | 0             | 0             | 0             |
| 1276       | 0            | 0            | 0            | 0            | 0            | 0            | 0           | 7           | 0           | 0             | 0             | 0             |
| 1277       | 0            | 0            | 0            | 0            | 0            | 0            | 0           | 0           | 0           | 0             | 0             | 7             |
| 1278       | 0            | 0            | 0            | 0            | 0            | 0            | 0           | 0           | 0           | 0             | 0             | 7             |
| 1279       | 0            | 0            | 0            | 0            | 0            | 0            | 0           | 7           | 0           | 0             | 0             | 0             |
| 1280       | 0            | 0            | 0            | 0            | 0            | 0            | 0           | 0           | 7           | 0             | 0             | 0             |
| 1281       | 0            | 0            | 0            | 0            | 0            | 0            | 0           | 0           | 7           | 0             | 0             | 0             |
| 1282       | 0            | 0            | 0            | 0            | 0            | 0            | 0           | 7           | 0           | 0             | 0             | 0             |
| 1283       | 0            | 0            | 0            | 0            | 0            | 0            | 0           | 0           | 0           | 0             | 0             | 7             |
| 1284       | 0            | 0            | 0            | 0            | 0            | 0            | 0           | 7           | 0           | 0             | 0             | 0             |
| 1285       | 0            | 0            | 0            | 0            | 0            | 0            | 0           | 0           | 0           | 0             | 0             | 0             |
| 1286       | 0            | 0            | 0            | 0            | 4            | 0            | 0           | 0           | 0           | 0             | 0             | 0             |
| 1287       | 0            | 0            | 0            | 0            | 0            | 0            | 0           | 0           | 0           | 0             | 7             | 0             |
| 1288       | 0            | 0            | 0            | 0            | 0            | 0            | 0           | 7           | 0           | 0             | 0             | 0             |
| 1289       | 0            | 0            | 0            | 0            | 0            | 0            | 0           | 0           | 0           | 7             | 0             | 0             |
| 1290       | 0            | 0            | 0            | 0            | 0            | 0            | 0           | 0           | 0           | 0             | 0             | 0             |
| 1291       | 0            | 0            | 0            | 0            | 0            | 0            | 0           | 0           | 0           | 7             | 0             | 0             |
| 1292       | 0            | 0            | 0            | 0            | 0            | 0            | 0           | 0           | 0           | 0             | 0             | 7             |
| 1293       | 0            | 0            | 0            | 0            | 0            | 0            | 0           | 0           | 0           | 0             | 0             | 0             |
| 1294       | 0            | 0            | 0            | 0            | 0            | 0            | 0           | 0           | 0           | 0             | 7             | 0             |
| 1295       | 0            | 0            | 0            | 0            | 0            | 0            | 0           | 0           | 0           | 7             | 0             | 0             |
| 1296       | 0            | 0            | 0            | 0            | 0            | 0            | 0           | 0           | 7           | 0             | 0             | 0             |
| 1297       | 0            | 0            | 0            | 0            | 0            | 0            | 0           | 0           | 0           | 0             | 0             | 0             |
| 1298       | 0            | 0            | 0            | 0            | 0            | 0            | 0           | 0           | 0           | 0             | 0             | 0             |
| 1299       | 1            | 0            | 0            | 0            | 0            | 0            | 0           | 0           | 0           | 0             | 0             | 0             |
| 1300       | 0            | 0            | 0            | 0            | 0            | 0            | 0           | 0           | 0           | 0             | 0             | 7             |
| 1301       | 0            | 0            | 0            | 0            | 0            | 0            | 0           | 0           | 0           | 0             | 0             | 0             |
| 1302       | 0            | 0            | 0            | 0            | 0            | 0            | 0           | 0           | 0           | 0             | 0             | 0             |
| 1303       | 0            | 0            | 0            | 0            | 0            | 0            | 0           | 0           | 0           | 0             | 0             | 0             |
| 1304       | 0            | 0            | 0            | 0            | 0            | 0            | 0           | 0           | 0           | 0             | 7             | 0             |
| 1305       | 0            | 0            | 0            | 0            | 0            | 0            | 0           | 0           | 0           | 7             | 0             | 0             |









| OTU Number | 7.11.15 Rep1 | 7.11.15 Rep2 | 7.11.15 Rep3 | 8.29.15 Rep1 | 8.29.15 Rep2 | 8.29.15 Rep3 | 2.6.16 Rep1 | 2.6.16 Rep2 | 2.6.16 Rep3 | 12.10.16 Rep1 | 12.10.16 Rep2 | 12.10.16 Rep3 |
|------------|--------------|--------------|--------------|--------------|--------------|--------------|-------------|-------------|-------------|---------------|---------------|---------------|
| 1441       | 0            | 0            | 0            | 0            | 0            | 0            | 0           | 0           | 0           | 0             | 0             | 6             |
| 1442       | 1            | 0            | 0            | 0            | 0            | 0            | 0           | 0           | 0           | 0             | 0             | 0             |
| 1443       | 2            | 0            | 4            | 0            | 0            | 0            | 0           | 0           | 0           | 0             | 0             | 0             |
| 1444       | 0            | 0            | 0            | 2            | 0            | 0            | 0           | 0           | 0           | 0             | 0             | 0             |
| 1445       | 0            | 0            | 1            | 1            | 3            | 1            | 0           | 0           | 0           | 0             | 0             | 0             |
| 1446       | 0            | 0            | 0            | 0            | 0            | 0            | 0           | 6           | 0           | 0             | 0             | 0             |
| 1447       | 0            | 0            | 0            | 0            | 0            | 0            | 0           | 0           | 6           | 0             | 0             | 0             |
| 1448       | 1            | 0            | 3            | 1            | 1            | 0            | 0           | 0           | 0           | 0             | 0             | 0             |
| 1449       | 0            | 0            | 0            | 0            | 0            | 0            | 0           | 0           | 0           | 0             | 0             | 6             |
| 1450       | 0            | 0            | 0            | 0            | 0            | 0            | 0           | 6           | 0           | 0             | 0             | 0             |
| 1451       | 0            | 0            | 0            | 0            | 0            | 0            | 0           | 0           | 0           | 0             | 0             | 0             |
| 1452       | 0            | 0            | 0            | 0            | 0            | 0            | 0           | 0           | 6           | 0             | 0             | 0             |
| 1453       | 0            | 0            | 0            | 0            | 0            | 0            | 0           | 0           | 6           | 0             | 0             | 0             |
| 1454       | 0            | 0            | 0            | 0            | 0            | 0            | 0           | 0           | 0           | 0             | 0             | 0             |
| 1455       | 0            | 0            | 0            | 0            | 0            | 0            | 0           | 0           | 6           | 0             | 0             | 0             |
| 1456       | 0            | 0            | 0            | 0            | 0            | 0            | 0           | 0           | 0           | 0             | 0             | 0             |
| 1457       | 0            | 0            | 0            | 0            | 0            | 0            | 0           | 0           | 6           | 0             | 0             | 0             |
| 1458       | 0            | 0            | 0            | 0            | 0            | 0            | 0           | 0           | 0           | 0             | 0             | 6             |
| 1459       | 2            | 0            | 0            | 0            | 0            | 0            | 0           | 0           | 0           | 0             | 0             | 0             |
| 1460       | 2            | 0            | 0            | 0            | 0            | 0            | 0           | 0           | 0           | 0             | 0             | 0             |
| 1461       | 0            | 0            | 0            | 0            | 0            | 0            | 0           | 0           | 6           | 0             | 0             | 0             |
| 1462       | 0            | 0            | 0            | 0            | 0            | 0            | 0           | 0           | 0           | 0             | 0             | 0             |
| 1463       | 0            | 0            | 0            | 0            | 0            | 0            | 0           | 0           | 6           | 0             | 0             | 0             |
| 1464       | 0            | 0            | 0            | 0            | 0            | 0            | 0           | 0           | 6           | 0             | 0             | 0             |
| 1465       | 0            | 0            | 0            | 0            | 0            | 0            | 0           | 0           | 0           | 0             | 0             | 0             |
| 1466       | 0            | 0            | 0            | 0            | 0            | 0            | 0           | 0           | 6           | 0             | 0             | 0             |
| 1467       | 0            | 0            | 0            | 0            | 0            | 0            | 0           | 0           | 0           | 0             | 0             | 0             |
| 1468       | 0            | 0            | 0            | 0            | 0            | 0            | 0           | 6           | 0           | 0             | 0             | 0             |
| 1469       | 0            | 0            | 0            | 0            | 0            | 0            | 0           | 6           | 0           | 0             | 0             | 0             |
| 1470       | 0            | 0            | 0            | 0            | 0            | 0            | 0           | 0           | 6           | 0             | 0             | 0             |
| 1471       | 0            | 0            | 0            | 0            | 0            | 0            | 0           | 0           | 0           | 0             | 0             | 6             |
| 1472       | 1            | 0            | 0            | 0            | 0            | 0            | 0           | 0           | 0           | 0             | 0             | 0             |
| 1473       | 0            | 0            | 0            | 0            | 0            | 0            | 0           | 0           | 0           | 0             | 6             | 0             |
| 1474       | 0            | 0            | 0            | 0            | 0            | 0            | 0           | 0           | 0           | 0             | 0             | 6             |
| 1475       | 0            | 0            | 0            | 0            | 0            | 0            | 0           | 0           | 0           | 0             | 0             | 0             |
| 1476       | 0            | 0            | 0            | 0            | 0            | 0            | 0           | 0           | 0           | 0             | 0             | 6             |
| 1477       | 0            | 0            | 0            | 0            | 0            | 0            | 0           | 0           | 0           | 0             | 0             | 0             |
| 1478       | 0            | 0            | 0            | 0            | 0            | 0            | 0           | 6           | 0           | 0             | 0             | 0             |
| 1479       | 0            | 0            | 0            | 0            | 0            | 0            | 0           | 0           | 0           | 0             | 0             | 0             |
| 1480       | 0            | 0            | 0            | 0            | 0            | 0            | 0           | 0           | 0           | 0             | 0             | 0             |
| 1481       | 0            | 0            | 0            | 0            | 0            | 0            | 0           | 0           | 6           | 0             | 0             | 0             |
| 1482       | 0            | 0            | 0            | 0            | 0            | 0            | 0           | 0           | 0           | 0             | 0             | 0             |
| 1483       | 0            | 0            | 0            | 0            | 0            | 0            | 0           | 0           | 0           | 0             | 0             | 0             |
| 1484       | 0            | 0            | 0            | 0            | 0            | 0            | 0           | 0           | 0           | 0             | 0             | 0             |
| 1485       | 0            | 0            | 0            | 0            | 0            | 0            | 0           | 6           | 0           | 0             | 0             | 0             |





















| OTU Number | 7.11.15 Rep1 | 7.11.15 Rep2 | 7.11.15 Rep3 | 8.29.15 Rep1 | 8.29.15 Rep2 | 8.29.15 Rep3 | 2.6.16 Rep1 | 2.6.16 Rep2 | 2.6.16 Rep3 | 12.10.16 Rep1 | 12.10.16 Rep2 | 12.10.16 Rep3 |
|------------|--------------|--------------|--------------|--------------|--------------|--------------|-------------|-------------|-------------|---------------|---------------|---------------|
| 1891       | 0            | 0            | 0            | 0            | 0            | 0            | 0           | 0           | 0           | 5             | 0             | 0             |
| 1892       | 0            | 0            | 0            | 0            | 0            | 0            | 0           | 0           | 0           | 5             | 0             | 0             |
| 1893       | 0            | 0            | 0            | 0            | 0            | 0            | 0           | 0           | 0           | 5             | 0             | 0             |
| 1894       | 0            | 0            | 0            | 0            | 0            | 0            | 0           | 5           | 0           | 0             | 0             | 0             |
| 1895       | 0            | 0            | 0            | 0            | 0            | 0            | 0           | 0           | 0           | 5             | 0             | 0             |
| 1896       | 0            | 0            | 0            | 0            | 0            | 0            | 0           | 0           | 0           | 0             | 5             | 0             |
| 1897       | 0            | 0            | 0            | 0            | 0            | 0            | 0           | 0           | 0           | 0             | 5             | 0             |
| 1898       | 0            | 0            | 0            | 0            | 0            | 0            | 0           | 0           | 0           | 0             | 0             | 0             |
| 1899       | 0            | 0            | 0            | 0            | 0            | 0            | 0           | 0           | 0           | 0             | 5             | 0             |
| 1900       | 0            | 0            | 0            | 0            | 0            | 0            | 0           | 0           | 0           | 0             | 0             | 0             |
| 1901       | 0            | 0            | 0            | 0            | 0            | 0            | 0           | 0           | 0           | 0             | 5             | 0             |
| 1902       | 0            | 0            | 0            | 0            | 0            | 0            | 0           | 0           | 0           | 0             | 0             | 0             |
| 1903       | 0            | 0            | 0            | 0            | 0            | 0            | 0           | 0           | 0           | 5             | 0             | 0             |
| 1904       | 0            | 0            | 0            | 0            | 0            | 0            | 0           | 5           | 0           | 0             | 0             | 0             |
| 1905       | 0            | 0            | 0            | 0            | 0            | 0            | 0           | 0           | 0           | 5             | 0             | 0             |
| 1906       | 0            | 0            | 0            | 0            | 0            | 0            | 0           | 5           | 0           | 0             | 0             | 0             |
| 1907       | 0            | 0            | 0            | 0            | 0            | 0            | 0           | 0           | 0           | 5             | 0             | 0             |
| 1908       | 0            | 0            | 0            | 0            | 0            | 0            | 0           | 0           | 0           | 5             | 0             | 0             |
| 1909       | 0            | 0            | 0            | 0            | 0            | 0            | 0           | 0           | 0           | 0             | 0             | 0             |
| 1910       | 0            | 0            | 0            | 0            | 0            | 0            | 0           | 0           | 0           | 0             | 0             | 0             |
| 1911       | 0            | 5            | 0            | 0            | 0            | 0            | 0           | 0           | 0           | 0             | 0             | 0             |
| 1912       | 0            | 0            | 0            | 0            | 0            | 0            | 0           | 0           | 0           | 0             | 0             | 0             |
| 1913       | 0            | 0            | 0            | 0            | 0            | 0            | 0           | 0           | 0           | 5             | 0             | 0             |
| 1914       | 0            | 0            | 0            | 0            | 0            | 0            | 0           | 0           | 0           | 5             | 0             | 0             |
| 1915       | 0            | 0            | 0            | 0            | 0            | 0            | 0           | 0           | 0           | 5             | 0             | 0             |
| 1916       | 0            | 0            | 0            | 0            | 0            | 0            | 0           | 0           | 0           | 5             | 0             | 0             |
| 1917       | 0            | 0            | 0            | 0            | 0            | 0            | 0           | 0           | 0           | 5             | 0             | 0             |
| 1918       | 0            | 0            | 0            | 0            | 0            | 0            | 1           | 0           | 0           | 0             | 0             | 0             |
| 1919       | 0            | 0            | 0            | 0            | 0            | 0            | 0           | 0           | 0           | 5             | 0             | 0             |
| 1920       | 0            | 0            | 0            | 0            | 0            | 0            | 0           | 0           | 0           | 5             | 0             | 0             |
| 1921       | 0            | 0            | 0            | 0            | 0            | 0            | 0           | 0           | 0           | 0             | 0             | 0             |
| 1922       | 0            | 0            | 0            | 0            | 0            | 0            | 0           | 0           | 0           | 5             | 0             | 0             |
| 1923       | 0            | 0            | 0            | 0            | 0            | 0            | 0           | 0           | 0           | 5             | 0             | 0             |
| 1924       | 0            | 0            | 0            | 0            | 0            | 0            | 5           | 0           | 0           | 0             | 0             | 0             |
| 1925       | 0            | 0            | 0            | 0            | 0            | 0            | 0           | 5           | 0           | 0             | 0             | 0             |
| 1926       | 0            | 0            | 0            | 0            | 0            | 0            | 0           | 5           | 0           | 0             | 0             | 0             |
| 1927       | 0            | 0            | 0            | 0            | 0            | 0            | 0           | 0           | 0           | 0             | 0             | 0             |
| 1928       | 0            | 0            | 0            | 0            | 0            | 0            | 0           | 5           | 0           | 0             | 0             | 0             |
| 1929       | 0            | 0            | 0            | 0            | 0            | 0            | 0           | 0           | 0           | 0             | 0             | 0             |
| 1930       | 0            | 0            | 0            | 0            | 0            | 0            | 0           | 5           | 0           | 0             | 0             | 0             |
| 1931       | 0            | 0            | 0            | 0            | 0            | 0            | 0           | 0           | 0           | 5             | 0             | 0             |
| 1932       | 0            | 0            | 0            | 0            | 0            | 0            | 0           | 0           | 0           | 5             | 0             | 0             |
| 1933       | 0            | 0            | 0            | 0            | 0            | 0            | 0           | 5           | 0           | 0             | 0             | 0             |
| 1934       | 0            | 0            | 0            | 0            | 0            | 0            | 0           | 0           | 0           | 0             | 0             | 0             |
| 1935       | 0            | 0            | 0            | 0            | 0            | 0            | 0           | 0           | 0           | 5             | 0             | 0             |
